# Supplementary material for: Towards defining the surgical workforce for children: a geospatial analysis in Brazil
Source: PubMed Central journal article supplement — BMJ Open. 2020 Mar 23;10(3):e034253. doi: 10.1136/bmjopen-2019-034253 (PMC7202732; doi:10.1136/bmjopen-2019-034253), 2020-03-23
Supplement: bmjopen-2019-034253.draft_revisions.pdf [file bmjopen-2019-034253.draft_revisions.pdf]

# BMJ Open

BMJ Open is committed to open peer review. As part of this commitment we make the peer review history of every article we publish publicly available.

When an article is published we post the peer reviewers' comments and the authors' responses online. We also post the versions of the paper that were used during peer review. These are the versions that the peer review comments apply to.

The versions of the paper that follow are the versions that were submitted during the peer review process. They are not the versions of record or the final published versions. They should not be cited or distributed as the published version of this manuscript.

BMJ Open is an open access journal and the full, final, typeset and author-corrected version of record of the manuscript is available on our site with no access controls, subscription charges or pay-per-view fees (<http://bmjopen.bmj.com>).

If you have any questions on BMJ Open's open peer review process please email [info.bmjopen@bmj.com](mailto:info.bmjopen@bmj.com)

# BMJ Open

## Towards Defining the Global Surgical Workforce for Children: A Geospatial Analysis in Brazil

|                               |                                                                                                                                                                                                                                                                                                                                                                                                                                                                                                                                                                                                                                                                                                          |
|-------------------------------|----------------------------------------------------------------------------------------------------------------------------------------------------------------------------------------------------------------------------------------------------------------------------------------------------------------------------------------------------------------------------------------------------------------------------------------------------------------------------------------------------------------------------------------------------------------------------------------------------------------------------------------------------------------------------------------------------------|
| Journal:                      | <i>BMJ Open</i>                                                                                                                                                                                                                                                                                                                                                                                                                                                                                                                                                                                                                                                                                          |
| Manuscript ID                 | bmjopen-2019-034253                                                                                                                                                                                                                                                                                                                                                                                                                                                                                                                                                                                                                                                                                      |
| Article Type:                 | Original research                                                                                                                                                                                                                                                                                                                                                                                                                                                                                                                                                                                                                                                                                        |
| Date Submitted by the Author: | 14-Sep-2019                                                                                                                                                                                                                                                                                                                                                                                                                                                                                                                                                                                                                                                                                              |
| Complete List of Authors:     | Rocha, Thiago; Duke University, Global Health Institute<br>Vissoci, Joao; Duke University, Global Health Institute<br>Rocha, Nubia; Federal University of Minas Gerais<br>Poenaru, Dan; Montreal Children's Hospital Research Institute, Pediatric Surgery<br>Shrime, Mark; Harvard Medical School, Department of Global Health and Social Medicine; Massachusetts Eye and Ear Infirmary, Department of Otolaryngology and Head and Neck Surgery<br>Smith, Emily; Baylor University, Health, Human Performance, and Recreation; Duke University, Duke University Global Health Institute<br>Rice, Henry; Duke University, Global Health Institute; Duke University Medical Center, Department of Surgery |
| Keywords:                     | Epidemiology < TROPICAL MEDICINE, PAEDIATRICS, SURGERY                                                                                                                                                                                                                                                                                                                                                                                                                                                                                                                                                                                                                                                   |
|                               |                                                                                                                                                                                                                                                                                                                                                                                                                                                                                                                                                                                                                                                                                                          |

SCHOLARONE™  
Manuscripts

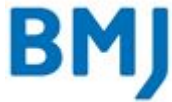

I, the Submitting Author has the right to grant and does grant on behalf of all authors of the Work (as defined in the below author licence), an exclusive licence and/or a non-exclusive licence for contributions from authors who are: i) UK Crown employees; ii) where BMJ has agreed a CC-BY licence shall apply, and/or iii) in accordance with the terms applicable for US Federal Government officers or employees acting as part of their official duties; on a worldwide, perpetual, irrevocable, royalty-free basis to BMJ Publishing Group Ltd ("BMJ") its licensees and where the relevant Journal is co-owned by BMJ to the co-owners of the Journal, to publish the Work in this journal and any other BMJ products and to exploit all rights, as set out in our [licence](#).

The Submitting Author accepts and understands that any supply made under these terms is made by BMJ to the Submitting Author unless you are acting as an employee on behalf of your employer or a postgraduate student of an affiliated institution which is paying any applicable article publishing charge ("APC") for Open Access articles. Where the Submitting Author wishes to make the Work available on an Open Access basis (and intends to pay the relevant APC), the terms of reuse of such Open Access shall be governed by a Creative Commons licence – details of these licences and which [Creative Commons](#) licence will apply to this Work are set out in our licence referred to above.

Other than as permitted in any relevant BMJ Author's Self Archiving Policies, I confirm this Work has not been accepted for publication elsewhere, is not being considered for publication elsewhere and does not duplicate material already published. I confirm all authors consent to publication of this Work and authorise the granting of this licence.

1  
2  
3  
4  
5 **Towards Defining the Global Surgical Workforce for Children: A Geospatial Analysis in**  
6 **Brazil**

7  
8 Thiago Augusto Hernandes Rocha,<sup>1,2</sup> João R.N. Vissoci,<sup>1,2,3,4</sup>, Núbia Cristina da Silva  
9  
10 Rocha,<sup>5</sup> Dan Poenaru,<sup>6</sup> Mark G. Shrime,<sup>7</sup> Emily R. Smith,<sup>1,8</sup> Henry E. Rice,<sup>1</sup> on behalf of  
11  
12 the Global Initiative for Children's Surgery  
13  
14  
15  
16

17 Affiliations and Addresses: <sup>1</sup>Duke Global Health Institute, Durham, NC, USA; <sup>2</sup>Federal University  
18 of Minas Gerais, School of Economics, Center of Post-Graduate and Research in Administration,  
19 Belo Horizonte, Minas Gerais, Brazil; <sup>3</sup>Graduate program in Health Sciences, State University of  
20 Maringá, Maringá, PR, Brazil; <sup>4</sup>Division of Global Neurosurgery and Neurology, Duke University  
21 Medical Center, Durham, NC, USA; <sup>5</sup>Federal University of Minas Gerais, Faculty of Economics,  
22 Observatory of Human Resources in Health, Belo Horizonte, Minas Gerais, Brazil; <sup>6</sup>Division of  
23 Pediatric General and Thoracic Surgery, The Montreal Children's Hospital, McGill University  
24 Health Centre, Montreal, QC, Canada; <sup>7</sup>Center for Global Surgery Evaluation, Massachusetts  
25 Eye and Ear Infirmary, and the Departments of Global Health and Social Medicine and of  
26 Otolaryngology, Harvard Medical School, Boston, Massachusetts, USA; <sup>8</sup>Department of Public  
27 Health, Robbins College of Health and Human Services, Baylor University, Waco, TX, USA.  
28  
29  
30  
31  
32  
33  
34  
35  
36  
37  
38  
39  
40  
41

42 Correspondence: Henry E. Rice, MD, Duke Global Health Institute, Box 3815, Duke University  
43 Medical Center, Durham, NC, 27710, USA. Phone (919)-681-5077, Fax (919)-681-8353, email:  
44 henry.rice@duke.edu  
45  
46  
47  
48  
49  
50

51 Key Words (MeSH headings): Surgery, anesthesia, Brazil, workforce, global health

52 Abstract Length: 282 words

53 Text Length: 2698 words

54 Table Count: 1

55 Figure Count: 6  
56  
57  
58  
59  
60

Reference Count: 29

For peer review only

1  
2  
3  
4  
5  
6  
7  
8  
9  
10  
11  
12  
13  
14  
15  
16  
17  
18  
19  
20  
21  
22  
23  
24  
25  
26  
27  
28  
29  
30  
31  
32  
33  
34  
35  
36  
37  
38  
39  
40  
41  
42  
43  
44  
45  
46  
47  
48  
49  
50  
51  
52  
53  
54  
55  
56  
57  
58  
59  
60

## ABSTRACT

**Objectives:** The optimal size of the health workforce for children's surgical care around the world remains poorly defined. The goal of this study was to characterize the surgical workforce for children across Brazil, and to identify associations between the surgical workforce and measures of childhood health.

**Design:** This study is an ecological, cross-sectional analysis using data from the Brazil public health system (*Sistema Único de Saúde*).

**Settings and Participants:** We collected data on the surgical workforce (pediatric surgeons, general surgeons, anesthesiologists, and nursing staff), perioperative mortality rate (POMR), and under-5 mortality rate (U5MR) across Brazil for 2015.

**Primary and Secondary Outcome Measures:** We performed descriptive analyses, and identified associations between the workforce and U5MR using geospatial analysis (Getis-Ord-Gi analysis, spatial cluster analysis, and quadratic regression models).

**Findings:** There were 39,926 general surgeons, 856 pediatric surgeons, 13,243 anesthesiologists, and 103,793 nurses across Brazil in 2015. The U5MR ranged from 11-26 deaths/1,000 live births and the POMR ranged from 0·11-0·17 deaths/100,000 children across the country. The surgical workforce is inequitably distributed across the country, with the wealthier South and Southeast regions having a higher workforce density as well as lower U5MR than the poorer North and Northeast regions. Using quadratic regression, we found an inverse relationship between the surgical workforce density and U5MR. An U5MR of 15 deaths/1,000 births across Brazil is associated with a workforce level of 5 pediatric surgeons, 200 surgeons, 100 anesthesiologists, or 700 nurses/100,000 children.

**Conclusions:** We found wide disparities in the surgical workforce and childhood mortality across Brazil, with both directly related to socioeconomic status. Areas of increased surgical workforce are associated with lower U5MR. Strategic investment in the surgical workforce may be required to attain optimal health outcomes for children in Brazil, particularly in rural regions.

**Funding:** None

## ARTICLE SUMMARY

### STRENGTHS AND LIMITATIONS OF THIS STUDY

#### Strengths

- Use of geospatial analysis allows precise definition of associations between the surgical workforce and under-5 mortality rate (U5MR) across Brazil.
- Analysis can demonstrate an inverse relationship between the surgical workforce and U5MR, allowing for location of areas of increased workforce which are associated with lower U5MR levels.
- Geospatial tools can confirm disparities in the surgical workforce as well as U5MR across Brazil, and support modeling to define relationship between the surgical workforce and U5MR.

#### Limitations

- Analysis of a one-year dataset does not allow for examination of the dynamics of workforce migration or growth.
- Although our findings of an association between surgical workforce and U5MR does not demonstrate causation.

## INTRODUCTION

Health care is workforce intensive, and an adequate level of human resources is essential to maintain strong health systems. Discrepancies between local health needs and the health workforce leads to clinical errors, wastage of resources, and increased patient mortality and morbidity.<sup>1</sup> For surgical care, the workforce is grossly inadequate and inequitably distributed in many low- and middle-income countries (LMICs), with rural areas disproportionately affected.<sup>2,3</sup>

Studies from the Lancet Commission on Global Surgery (LCoGS) have proposed a density of 20-40 specialist physicians (surgeons, anesthesiologists, or obstetricians, SAO) per 100,000 general population to attain desired health outcomes, such as perioperative mortality rate.<sup>2,4</sup> However, the surgical care for children is fundamentally different from adult care, with surgical resources provided through multiple tiers in a national health system in proportion to population needs and surgical complexity required.<sup>5</sup> In these complex health systems, the optimal surgical workforce for children remains poorly defined.

Brazil offers a rich environment to closely examine the health workforce, as it has extremely heterogeneous geography, health infrastructure, and socioeconomic status across the country (GINI index 53.3 in 2017).<sup>6,7</sup> Brazil has a large public health system (*Sistema Único de Saúde, SUS*) and maintains several publicly available datasets (DATASUS).<sup>6,8</sup> Efforts to reduce health disparities across the five Brazil regions (North, Northeast, Midwest, Southeast, and South) have made great strides in recent years, particularly through workforce expansion in primary care.<sup>9</sup>

Previous geospatial analysis by ourselves and others have identified wide disparities in surgical care across Brazil.<sup>10,11</sup> Facilities providing surgical care for children are inequitably distributed across the country, with higher density of infrastructure and surgical access associated with areas of higher socioeconomic status.<sup>10</sup> Spatial cluster analysis demonstrated a higher under-5 mortality rate (U5MR) in the poorer North, Northeast, and Midwest regions compared to the wealthier Southeast and South regions, although perioperative mortality rate (POMR) for a proxy set of children's conditions does not vary across the country.<sup>10</sup> Increased access to surgical care is associated with a lower U5MR, and access to surgical care differs by geographic region independent of socioeconomic status.

The goals of this study are to characterize the surgical workforce for children in the public health system in Brazil using geospatial analysis and to identify associations between the surgical workforce and childhood mortality rates. Through this analysis, we hope to provide an assessment of Brazil's surgical workforce, identify disparities in workforce distribution, and estimate the required surgical workforce to obtain desired health outcomes for children.



## METHODS

This study is an ecological, cross-sectional, geospatial analysis using data from the Brazil public health system. Brazil is composed of 5,570 municipalities across the union of the Federal District and 26 states, which are distributed across five regions (Midwest, North, Northeast, South, and Southeast). We collected data on all children < 15 years of age undergoing a surgical procedure from 2010 to 2015 across Brazil using datasets from DATASUS (see Table 1 for all datasets and study timeframes). Auxiliary data were collected from databases from the World Bank and the Brazilian Institute of Geography and Statistics (IBGE).<sup>8</sup> We used several tools of geospatial analysis to explore relationships between surgical workforce, POMR, and U5MR. All health estimates were summarized in line with the GATHER statement.<sup>12</sup>

We extracted demographic and socioeconomic indicators from Brazilian Institute of Geography and Statistics (IBGE).<sup>13</sup> We used this data along with the Brazilian gross domestic product (GDP) to classify municipalities according to income groups as high income, upper-middle income, or lower-middle income as defined by the 2017 World Bank criteria of gross national income (GNI) per capita adjusted to US dollars (low income: GNI per capita \$1,005 or less; lower middle-income: GNI per capita between \$1,006 and \$3,955; upper middle-income: GNI per capita between \$3,956 and \$12,235; high-income > \$12,235) (Fig 1).<sup>14</sup>

### **Surgical workforce density**

We summarized data on the surgical workforce at the municipality, state, and regional levels. We summarized several workforce roles, including general surgeons, pediatric surgeons, anesthesiologists, obstetricians, and nurses, using professional role definitions from the CNES. The CNES keeps a record of the appointment of all health providers at public health facilities. The density of each profession was weighted per 100,000 children. For comparison to common surgical workforce metrics used in the Lancet Commission on Global Surgery,<sup>2-4</sup> we also summarized the density of surgeons, anesthesiologists, and obstetricians (SAO).

### **Under-5 child mortality rate (U5MR) and perioperative mortality rate (POMR)**

We summarized annual all-cause under-5 pediatric mortality rates (U5MR) at the regional and municipality level using data from the Brazilian Mortality Information System database (SIM), which collects data on all deaths by age, sex, cause, and residence.<sup>8</sup> The U5MR was calculated using methods of the Inter Agency Group for Mortality Estimation (IGME), and was expressed as deaths per 1,000 live births.<sup>15</sup>

1  
2  
3 We collected procedure-based perioperative mortality rate (POMR) from the DATASUS  
4 Hospitalization Information System database (SIH) using the procedure codes for a proxy set of  
5 general surgical procedures. This set was based on the Optimal Resources for Children's  
6 Surgery (OReCS) document of the Global Initiative for Children's Surgery, which specifies  
7 representative surgical procedures to assess the delivery of surgical care within a national health  
8 system.<sup>5</sup> These five procedures included appendectomy, colostomy, hernia repair, laparotomy,  
9 and abdominal wall reconstruction for gastroschisis, omphalocele, or other indication. The SIH  
10 defines perioperative mortality as any death occurring during any surgical procedure. We  
11 summarized procedure-specific POMR at the regional level across the country.  
12  
13  
14  
15  
16  
17

18 Note that due to differences in the patterns of POMR and U5MR across the country,<sup>10</sup> we limited  
19 analysis of the surgical workforce to use of U5MR as the outcome metric. We chose not to use  
20 POMR, as the SIH dataset only records deaths occurring during operative procedures and thus  
21 likely underestimates the true POMR, which is generally accepted as within 30 days of surgery.<sup>16</sup>  
22 In light of this data quality limitation, we used U5MR for subsequent analysis of associations  
23 between the surgical workforce and measures of childhood health.  
24  
25  
26  
27  
28

### 29 **Data analysis**

30  
31 All analyses were performed using the municipality as the main observation unit. We summarized  
32 descriptive outcomes at the municipality, state, and regional levels. The density of the surgical  
33 workforce and U5MR were displayed using geospatial choropleth maps.  
34  
35  
36

37 To further identify potential associations between the surgical workforce and U5MR, we  
38 performed Getis-Ord Gi analysis.<sup>17</sup> This measure of spatial heterogeneity uses autocorrelation  
39 and hot spot techniques to assess associations within spatial random variables. For our study, we  
40 identified hot spots (red areas) depicting clusters of municipalities with adjacent municipalities  
41 with high values for a given indicator (workforce density or U5MR), and cold spots (blue areas)  
42 depicting areas of adjacent clusters with low values for each indicator. Yellow areas mark  
43 locations where no clustering was observed. Geographic mapping was used to identify the  
44 distribution of each indicator within a spatial area.<sup>17</sup>  
45  
46  
47  
48  
49  
50

51 To summarize geographic relationships between the surgical workforce density and U5MR, we  
52 plotted data using scatter plot graphs and created a series of quadratic regression models to  
53 define associations between the workforce density and U5MR, considering the U5MR at the state  
54 level as the primary outcome. We also used cubic spline plots to analyze these data, although  
55 quadratic regression models showed higher goodness of fit and were used for further analysis.  
56  
57 The line resulting from each regression model was plotted using bivariate scatterplots. Each point  
58  
59  
60

1  
2  
3 in the graphic was proportional to the average U5MR (per 1,000 live births), with display by state  
4 as well as by region level.  
5

### 6 7 **Patient and public involvement** 8

9  
10 As an ecological study, there was no direct patient involvement with this research. However,  
11 there is public interest in addressing challenges with the surgical care of children in Brazil. We  
12 used anonymized publically available datasets to address these research questions. All research  
13 findings will be disseminated to the public and health community in Brazil through publication,  
14 academic meetings, and social media.  
15  
16

### 17 18 **Data sharing statement** 19

20  
21 All data used for this analysis were obtained from the open access DATASUS system, from the  
22 Brazilian Ministry of Health. Data can be obtained, freely, from: <http://tabnet.datasus.gov.br/>.  
23  
24  
25  
26  
27

## 28 **RESULTS** 29

30  
31 We found that there were 39,926 general surgeons, 856 pediatric surgeons, 13,243  
32 anesthesiologists, 103,793 nurses, and 9,674 obstetricians across Brazil in 2015. During the  
33 same year, there were 43,045 reported deaths in children under five years of age in Brazil, with  
34 the U5MR ranging between 11-26 deaths/1,000 live births across states. The POMR for the proxy  
35 set of surgical procedures ranged from 0·11-0·17 deaths/100,000 children across regions.  
36  
37  
38

### 39 40 **Disparities in the surgical workforce and U5MR across Brazil** 41

42  
43 The surgical workforce for children in Brazil is unequally distributed across the country, with the  
44 South and Southeast regions having a higher density of all professional roles, while the North and  
45 Northeast regions have a lower density of each role (Fig 2). We found disparities in U5MR across  
46 the country, with wide variations across states and regions. The South and Southeast regions  
47 had the lowest U5MR and had the highest socioeconomic status. In contrast, the North and  
48 Northeast regions had higher U5MR as well as lower areas of socioeconomic status (Fig 3).  
49  
50  
51

52  
53 At a municipality level, we found wide disparities in the workforce density as well as U5MR across  
54 Brazil, with inequities even within states (Fig 4). Several municipalities did not have even one  
55 general surgeon, pediatric surgeon, obstetrician, or anesthesiologist. Even within the wealthier  
56 North and Northeast regions, there are inequities in workforce distribution, with the workforce  
57  
58  
59  
60

1  
2  
3 preferentially localized in areas around the state capitals. This distribution was similar to the  
4 U5MR at the municipality level.  
5

6  
7 We found a direct association between the surgical workforce and U5MR across Brazil, with  
8 higher density of each professional role associated with lower U5MR across regions (Fig 5). This  
9 pattern is consistent across workforce roles (surgeon, anesthesiologist, nursing, etc.), although  
10 there are some variations in the distribution patterns across the country. For example, in the  
11 South and Southeast, we found the highest density of pediatric surgeons as well as the lowest  
12 levels of U5MR, although this pattern was not seen in the Federal District, where there was a  
13 high density of all workforce roles as well as higher levels of U5MR compared to surrounding  
14 regions. The Federal district is where the Brazilian government is located, and the density of the  
15 surgical workforce in this state-city was higher than in all other states.  
16  
17  
18  
19  
20  
21

## 22 **Relationship between surgical workforce density and U5MR**

23

24  
25 By use of scatter plots, we developed a set of quadratic regression models to define the  
26 association between the density of surgical workforce at the state level and U5MR (Fig 6A-F). We  
27 found that although the slope of each curve varied across professional roles, all professional  
28 roles had a direct relationship between workforce density and U5MR. Regression analyses  
29 supported the trends highlighted in the maps.  
30  
31  
32  
33  
34  
35  
36

## 37 **DISCUSSION**

38

39  
40 As surgical care is an essential component of functioning health care systems, there is a need to  
41 improve our understanding of the surgical workforce for children. Brazil has wide disparities in  
42 socioeconomic status and health care delivery.<sup>18,19</sup> Our previous work has shown disparities in  
43 delivery and infrastructure for surgical care for children across Brazil, with areas of higher  
44 socioeconomic status associated with increased delivery of surgical care.<sup>10</sup> Our current study  
45 demonstrates similar disparities in the surgical workforce across the country, with a higher  
46 workforce density related to areas of higher socioeconomic status. As well, increased surgical  
47 workforce is associated with areas of lower U5MR, suggesting that an adequate and equitable  
48 surgical workforce is essential for support of high-quality health care for children.  
49  
50  
51  
52  
53  
54

55 Disparities in surgical care for adults have been previously noted in Brazil as well as other  
56 countries, although systems to minimize disparities in the surgical care for children remain poorly  
57 understood. Reports from the Lancet Commission on Global Surgery have shown an association  
58 between the density of surgeons, anesthesiologists, and obstetricians (SAO) and the rate of  
59  
60

1  
2  
3 surgical procedures or perioperative mortality rates.<sup>2-4</sup> Our data aligns with recent analyses of  
4 surgical care for adults in Brazil, which showed wide disparities in manpower and surgical  
5 care.<sup>11,20</sup> The Brazilian government has long recognized challenges with health care delivery  
6 across the country, and have implemented several programs to increase primary care access in  
7 rural areas.<sup>6,9,21</sup>  
8  
9  
10

11  
12 The perioperative mortality rate is often used to gauge the quality of a surgical system,<sup>16</sup> although  
13 we suggest that metrics of overall childhood health such as U5MR may offer an alternative, and  
14 potentially even more valuable metric to guide manpower planning. First, given the increasing  
15 emphasis on surgical care as an integral part of a comprehensive health system, associations  
16 between the workforce and overall population health may be the most appropriate measure of  
17 manpower across an entire health system, including the surgical workforce.<sup>16</sup> For example, care  
18 of neonates or children with cancer often require surgical care, and an adequate surgical  
19 workforce is essential to ensure high-quality outcomes for these children. Second, despite  
20 interest around the world for collection of perioperative mortality rates, data quality continues to  
21 be challenging.<sup>22</sup> Our previous work in Brazil suggests that data quality for POMR is too poor to  
22 allow for analysis of the surgical workforce.<sup>10,16</sup> Third, the United Nations and the World Health  
23 Organization have identified several indicators to evaluate health interventions in children,  
24 including the U5MR, rate of growth stunting, immunization coverage, and prevalence of common  
25 childhood diseases.<sup>23</sup> These metrics are routinely collected around the world, and our analysis  
26 suggests that strategic expansion of the surgical workforce can be guided by these metrics.  
27 Finally, we confirmed an association between the nursing workforce and U5MR, as few analyses  
28 have examined the nursing workforce requirements for surgical care.  
29  
30  
31  
32  
33  
34  
35  
36  
37  
38  
39

40 To assist with policy development, geospatial analysis can identify priority regions of workforce  
41 needs. The sequence of steps in our analysis may be generalizable to other countries to guide  
42 scale-up of the surgical workforce to desired levels of health outcomes. For example, we found  
43 that U5MR of 15 deaths/1,000 births across Brazil is associated with an approximate workforce  
44 level of 5 pediatric surgeons, 200 surgeons, 100 anesthesiologists, or 700 nurses/100,000  
45 children. Geospatial analyses has help guide health workforce expansion in Thailand,<sup>24</sup> as well as  
46 in some countries in sub-Saharan Africa.<sup>25</sup> However, we caution that the workforce associations  
47 in Brazil may not be applicable to other countries. As well, geospatial analysis requires access to  
48 high quality national datasets, which remains problematic in many countries around the world.  
49  
50  
51  
52  
53  
54

55 The areas of Brazil with lower socioeconomic status remain challenging environments for health  
56 care, where there is a long history of difficulties with retention of health care professionals.<sup>18,19</sup>  
57 Our findings align with studies of adult surgical workforce in Brazil, which have shown inequities  
58 in the density of SAO professionals across the country, with rural regions disproportionately  
59  
60

1  
2  
3 affected.<sup>26</sup> Similar to many counties around the world, the rural areas in Brazil have high levels of  
4 poverty and a scarcity of health infrastructure.<sup>27,28</sup> Brazil has successfully increased access to the  
5 primary care workforce in rural areas through the *Mais Médicos* program,<sup>29</sup> and our findings  
6 suggest that similar expansion of the surgical workforce may improve the health of children.  
7  
8

9  
10 As with any population-based study, our work has several limitations. The analysis of a one-year  
11 dataset does not allow for examination of the dynamics of workforce migration or growth. There is  
12 a lack of consensus in geospatial analysis about how the density of professionals should be  
13 weighted regarding different populations (i.e. overall population, child population, etc.), although  
14 we chose to weigh by child population. Although our findings of an association between surgical  
15 workforce and U5MR does not demonstrate causation and indeed many factors impact the  
16 U5MR, it does suggest that a robust surgical workforce is required for the provision of high-quality  
17 care for children. Analysis of the workforce of the Federal District in Brazil is particularly  
18 challenging, as the presence of the federal administrative structure might be responsible for the  
19 high density of surgeons in this location. Finally, we recognize that the surgical workforce  
20 includes many type of subspecialists that were not included in our analysis.  
21  
22

23  
24 In conclusion, we found that the surgical workforce for children is inadequate and inequitably  
25 distributed across Brazil, suggesting that strategic investment in the surgical workforce is required  
26 to support high-quality and equitable health care for children. There is a direct relation between  
27 the surgical workforce and U5MR across Brazil, with higher levels of the surgical workforce  
28 associated with improved U5MR. These findings have several policy implications to improve the  
29 health of children in Brazil:  
30  
31

- 32 • Increased investment in the surgical workforce is required to support the health of children  
33 in Brazil, particularly in rural regions
  - 34 • Identification of associations between the workforce and measures of population health  
35 (such as U5MR) may be a valuable tool to define surgical workforce levels in LMICs
  - 36 • Definition of workforce indicators is particularly challenging for children's surgical care  
37 given the complexity of care across different levels of national health systems
  - 38 • Geospatial analysis can help define the required surgical workforce to attain desired  
39 population health goals, and may be generalizable across other LMICs
- 40  
41  
42  
43  
44  
45  
46  
47  
48  
49  
50  
51  
52  
53  
54  
55

## 56 **ACKNOWLEDGEMENTS**

57  
58  
59  
60



- 1  
2  
3 • We want to thank the Global Initiative for Children's Surgery (GICS) for its support of this  
4 work. GICS ([www.globalchildrensurgery.org](http://www.globalchildrensurgery.org)) is a network of children's surgical and  
5 anesthesia providers from low-, middle-, and high-income countries collaborating for the  
6 purpose of improving the quality of surgical care for children globally. There was no  
7 external funding source for this study.  
8  
9  
10

## 11 12 **FOOTNOTES**

### 13 14 15 **CONTRIBUTORS**

16  
17 TAHR, JRNV, and HER had the initial idea for this analysis. TAHR, JRNV, NCS, and HER  
18 performed the initial analysis and wrote the first draft. The analysis and manuscript were  
19 completed and revised in collaboration with DP, MGS, and ERS. All co-authors read and  
20 approved the final manuscript.  
21  
22  
23

### 24 25 **DECLARATION OF INTERESTS**

26  
27 We declare no competing interests.  
28  
29

### 30 31 **IRB APPROVAL**

32  
33 Not required.  
34  
35  
36  
37  
38  
39  
40  
41  
42  
43  
44  
45  
46  
47  
48  
49  
50  
51  
52  
53  
54  
55  
56  
57  
58  
59  
60

## REFERENCES

1. Lopes MA, Almeida AS, Almada-Lobo B. Handling healthcare workforce planning with care: where do we stand? *Hum Resour Health* 2015;**13**:38. doi: 10.1186/s12960-015-0028-0 [published Online First: 2015/05/25]
2. Meara JG, Leather AJ, Hagander L, *et al.* Global Surgery 2030: Evidence and solutions for achieving health, welfare, and economic development. *Lancet* 2015;**386**(9993):569-624.
3. Holmer H, Lantz A, Kunjumen T, *et al.* Global distribution of surgeons, anaesthesiologists, and obstetricians. *Lancet Glob Health* 2015;**3 Suppl 2**:S9-11. doi: 10.1016/s2214-109x(14)70349-3 [published Online First: 2015/05/01]
4. Rose J, Weiser TG, Hider P, *et al.* Estimated need for surgery worldwide based on prevalence of diseases: a modeling strategy for the WHO Global Health Estimate. *Lancet Glob Health* 2015;**3**:Suppl 2:S13-20.
5. Goodman LF, St-Louis E, Yousef Y, *et al.* The Global Initiative for Children's Surgery: Optimal Resources for Improving Care. *Eur J Pediatr Surg* 2018;**28**(01):051-59. doi: 10.1055/s-0037-1604399 [published Online First: 14.08.2017]
6. Paim J, Travassos C, Almeida C, *et al.* The Brazilian health system: history, advances, and challenges. *Lancet* 2011;**377**(9779):1778-97. doi: 10.1016/s0140-6736(11)60054-8 [published Online First: 2011/05/13]
7. World Bank. GINI Index (World Bank estimate) Washington DC: World Bank; 2017 [Available from: <https://data.worldbank.org/indicator/si.pov.gini>.
8. Brasil. Departamento de Informática do SUS - DATASUS. Informações de Saúde (TABNET) 2015 [Available from: <http://www2.datasus.gov.br/DATASUS/index.php?area=02> Accessed June 2015.
9. Nunes BP, Thume E, Tomasi E, *et al.* Socioeconomic inequalities in the access to and quality of health care services. *Revista de saude publica* 2014;**48**(6):968-76. doi: 10.1590/s0034-8910.2014048005388 [published Online First: 2015/06/04]
10. Vissoci JRN, Ong CT, de Andrade L, *et al.* Disparities in surgical care for children across Brazil: use of geospatial analysis. *PLoS One* 2019;**14**(8):e0220959. doi: <https://doi.org/10.1371/journal.pone.0220959>
11. Massenburg BB, Saluja S, Jenny HE, *et al.* Assessing the Brazilian surgical system with six surgical indicators: a descriptive and modelling study. *BMJ Glob Health* 2017;**2**(2):e000226. doi: 10.1136/bmjgh-2016-000226 [published Online First: 2017/06/08]
12. Stevens GA, Alkema L, Black RE, *et al.* Guidelines for accurate and transparent health estimates reporting: the GATHER statement. *Lancet* 2016;**388**(10062):e19-e23. doi: 10.1016/s0140-6736(16)30388-9 [published Online First: 2016/07/03]
13. Instituto Brasileiro de Geografia e Estatística. Estatísticas sociodemográficas do Brasil 2014 [Available from: <http://www.ibge.gov.br/home/> accessed Accessed Jan 2018.
14. World Health Organization. World Health Statistics 2017: Monitoring Health for the SDGs, Sustainable Development Goals. Geneva: World Health Organization, 2017.
15. UNICEF, WHO, Bank TW, *et al.* Levels and trends of child mortality in 2006: estimates developed by the Inter-agency Group for Child Mortality Estimation New York 2007 [Available from: <http://mdgs.un.org/unsd/mdg/Resources/Attach/Capacity/Ind%204-1.pdf> accessed Sept 1 2018.



16. Watters DA, Hollands MJ, Gruen RL, *et al*. Perioperative mortality rate (POMR): A global indicator of access to safe surgery and anaesthesia. *World J Surg* 2015;**39**(4):856-64. doi: 10.1007/s00268-014-2638-4 [published Online First: 2014/05/21]
17. Getis A, Ord JK. The analysis of spatial association by use of distance statistics. *Geogr Anal* 1992;**24**(3):189-206. doi: doi:10.1111/j.1538-4632.1992.tb00261.x
18. Rocha TAH, da Silva NC, Amaral PV, *et al*. Access to emergency care services: a transversal ecological study about Brazilian emergency health care network. *Public Health* 2017;**153**:9-15.
19. Santos ASD, Duro SMS, Cade NV, *et al*. Quality of infant care in primary health services in Southern and Northeastern Brazil. *Revista de saude publica* 2018;**52**:11. doi: 10.11606/s1518-8787.2018052000186 [published Online First: 2018/02/08]
20. Alonso N, Massenburg BB, Galli R, *et al*. Surgery in Brazilian health care: Funding and physician distribution. *Rev Col Bras Cir* 2017;**44**(2):202-07.
21. Brazil. Programa Mais Medicos 2015 [Available from: <http://maismedicos.gov.br/> accessed Feb 1 2015.
22. Ng-Kamstra JS, Arya S, Greenberg SLM, *et al*. Perioperative mortality rates in low-income and middle-income countries: a systematic review and meta-analysis. *BMJ Glob Health* 2018;**3**(3):e000810. doi: 10.1136/bmjgh-2018-000810 [published Online First: 2018/07/11]
23. World Health Organization. Monitoring maternal, newborn and child health: Understanding key progress indicators. Geneva: World Health Organization, 2011.
24. Witthayapipopsakul W, Cetthakrikul N, Suphanchaimat R, *et al*. Equity of health workforce distribution in Thailand: an implication of concentration index. *Risk management and healthcare policy* 2019;**12**:13-22. doi: 10.2147/rmhp.s181174 [published Online First: 2019/02/23]
25. Agyepong IA, Sewankambo N, Binagwaho A, *et al*. The path to longer and healthier lives for all Africans by 2030: the Lancet Commission on the future of health in sub-Saharan Africa. *Lancet* 2018;**390**(10114):2803-59. doi: 10.1016/s0140-6736(17)31509-x [published Online First: 2017/09/18]
26. Scheffer MC, Guilloux AGA, Matijasevich A, *et al*. The state of the surgical workforce in Brazil. *Surgery* 2017;**161**(2):556-61. doi: 10.1016/j.surg.2016.09.008 [published Online First: 2017/03/28]
27. Bearden A, Fuller AT, Butler EK, *et al*. Rural and urban differences in treatment status among children with surgical conditions in Uganda. *PLoS One* 2018;**13**(11):e0205132. doi: 10.1371/journal.pone.0205132 [published Online First: 2018/11/02]
28. Smith ER, Vissoci JRN, Rocha TAH, *et al*. Geospatial analysis of unmet pediatric surgical need in Uganda. *J Pediatr Surg* 2017;**52**(10):1691-98. doi: 10.1016/j.jpedsurg.2017.03.045 [published Online First: 2017/04/22]
29. Lima RT, Fernandes TG, Balieiro AA, *et al*. Primary health care in Brazil and the Mais Medicos (More Doctors) Program: an analysis of production indicators. *Cien Saude Colet* 2016;**21**(9):2685-96. doi: 10.1590/1413-81232015219.15412016 [published Online First: 2016/09/23]

## FIGURE LEGENDS

Figure 1-Income group distribution of Brazilian municipalities. Socioeconomic data were extracted from Brazilian Institute of Geography and Statistic (IBGE), and used with the Brazilian gross domestic product to classify municipalities according to income groups as defined by the World Bank as high-income, upper-middle-income, or lower-middle-income. The map of Brazil was freely obtained in shapefile format (SHP) through online access to the website of the Brazilian Institute of Geography and Statistics (<https://mapas.ibge.gov.br/bases-e-referenciais/bases-cartograficas/malhas-digitais.html>). Reprinted from Vissoci et al.<sup>10</sup>

Figure 2-The density (rate) of the surgical workforce for each professional role across Brazil as summarized by region. The density of each professional role is weighted per 100,000 children.

Figure 3-Under 5 mortality rates (U5MR, per 1,000 live births) across Brazil summarized by state as well as by region levels.

Figure 4-Spatial distribution of the surgical workforce density (weighted per 100,000 children) or under-5 mortality rate (U5MR, per 1,000 live births) at the municipality level.

Figure 5-Hot spot cluster analysis of association between the surgical workforce density (weighted per 100,000 children) and under-5 mortality rate (U5MR, per 1,000 live births) across Brazil using Getis-Ord-Gi analysis.<sup>17</sup> Hot spots (red areas) depict clusters of municipalities with adjacent municipalities with high values for a given indicator (workforce density or U5MR), and cold spots (blue areas) depict clusters with an adjacent low values regarding each indicator. Yellow areas mark locations where no clustering was observed.

Figure 6 (A-F)-Association between the density of the surgical workforce (weighted per 100,000 children) and under-5 mortality rate (U5MR, per 1,000 live births) in each state across Brazil. Quadratic regression models were used to define associations between the workforce density and U5MR. The line resulting from each regression model was plotted using bivariate scatterplots. The size of each point in the graphic is proportional to the average U5MR for each state, with different colors used to summarize data by region.

**Table 1: Data Sources for Analysis**

| Source                                                 | Variables                                                                                                                                                                                                                   | Date Range | Data entries        | Scope                                                                                                                                                                                                                                                                      |
|--------------------------------------------------------|-----------------------------------------------------------------------------------------------------------------------------------------------------------------------------------------------------------------------------|------------|---------------------|----------------------------------------------------------------------------------------------------------------------------------------------------------------------------------------------------------------------------------------------------------------------------|
| DATASUS - Hospitalization information system (SIH)     | <ul style="list-style-type: none"> <li>Hospitalization procedures performed</li> <li>ICD code</li> <li>Age of patient</li> <li>Location of residence</li> <li>Costs associate to the procedure</li> <li>Hospital</li> </ul> | 2008-2015  | 267,248 procedures  | Appendectomy (ICD 10 0DTJ4ZZ, 0DTJ0ZZ)<br>Laparotomy (ICD 10 0WJP0ZZ)<br>Hernia (ICD 10 0YQ54ZZ, 0YQ64ZZ, 0YQ50ZZ, 0YQ60ZZ, 0WQF4ZZ, 0WUF07Z, 0WUF0KZ, 0BQR4ZZ, 0BQS4ZZ, 0BQR0ZZ, 0BQS0ZZ)<br>Colostomy (ICD 10 0WQFXZ2)<br>Abdominal wall reconstruction (ICD 10 0WQF0ZZ) |
| DATASUS - Mortality information system (SIM)           | <ul style="list-style-type: none"> <li>Deaths of patients under 14 years old</li> <li>The municipality of residence and of death</li> <li>Mortality rate by municipality</li> </ul>                                         | 2010-2015  | 326,459 deaths      | All deaths between 2010 and 2015                                                                                                                                                                                                                                           |
| CNES - National registration of health establishments  | <ul style="list-style-type: none"> <li>Geolocation</li> <li>Type of care provided</li> <li>Accreditation</li> </ul>                                                                                                         | 2014       | 6,498 hospitals     | District and referral level hospitals                                                                                                                                                                                                                                      |
| World Bank                                             | <ul style="list-style-type: none"> <li>Gross national income (GNI)</li> <li>Atlas index</li> <li>GNI per capita</li> <li>Income level classification</li> </ul>                                                             | 2010-2013  | 5565 municipalities | -                                                                                                                                                                                                                                                                          |
| IBGE - Brazilian institute of geography and statistics | <ul style="list-style-type: none"> <li>Pediatric population by municipality</li> <li>Gross domestic product (GDP)</li> <li>GDP per capita</li> </ul>                                                                        | 2008-2014  | 5565 municipalities | -                                                                                                                                                                                                                                                                          |

**Table 1.** Primary datasets used for analysis derived from the Brazilian public health system (*Sistema Único de Saúde, SUS*), which maintains several publicly available datasets (DATASUS). Auxiliary data collected from the World Bank and the Brazilian Institute of Geography and Statistic (IBGE).

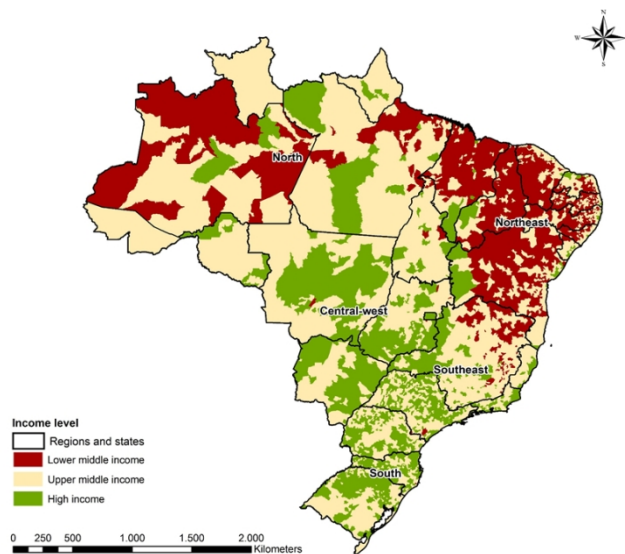

338x190mm (96 x 96 DPI)

1  
2  
3  
4  
5  
6  
7  
8  
9  
10  
11  
12  
13  
14  
15  
16  
17  
18  
19  
20  
21  
22  
23  
24  
25  
26  
27  
28  
29  
30  
31  
32  
33  
34  
35  
36  
37  
38  
39  
40  
41  
42  
43  
44  
45  
46  
47  
48  
49  
50  
51  
52  
53  
54  
55  
56  
57  
58  
59  
60

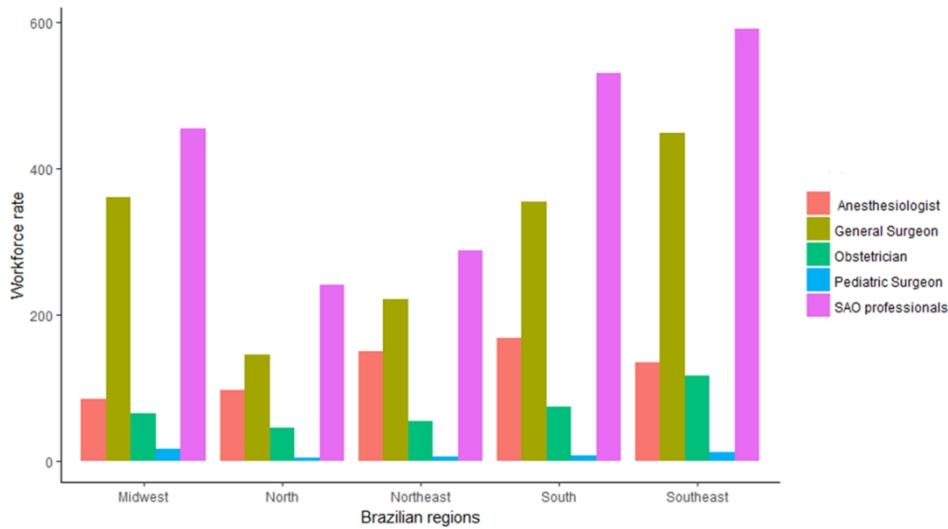

338x190mm (96 x 96 DPI)

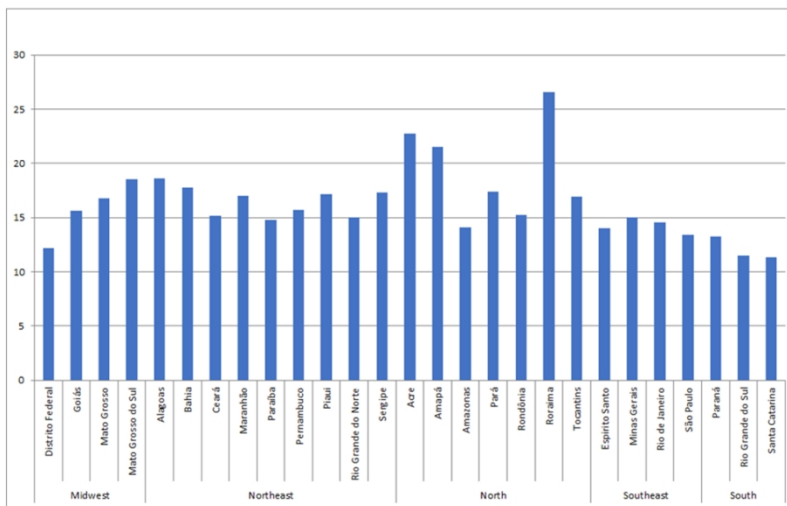

338x190mm (96 x 96 DPI)

1  
2  
3  
4  
5  
6  
7  
8  
9  
10  
11  
12  
13  
14  
15  
16  
17  
18  
19  
20  
21  
22  
23  
24  
25  
26  
27  
28  
29  
30  
31  
32  
33  
34  
35  
36  
37  
38  
39  
40  
41  
42  
43  
44  
45  
46  
47  
48  
49  
50  
51  
52  
53  
54  
55  
56  
57  
58  
59  
60

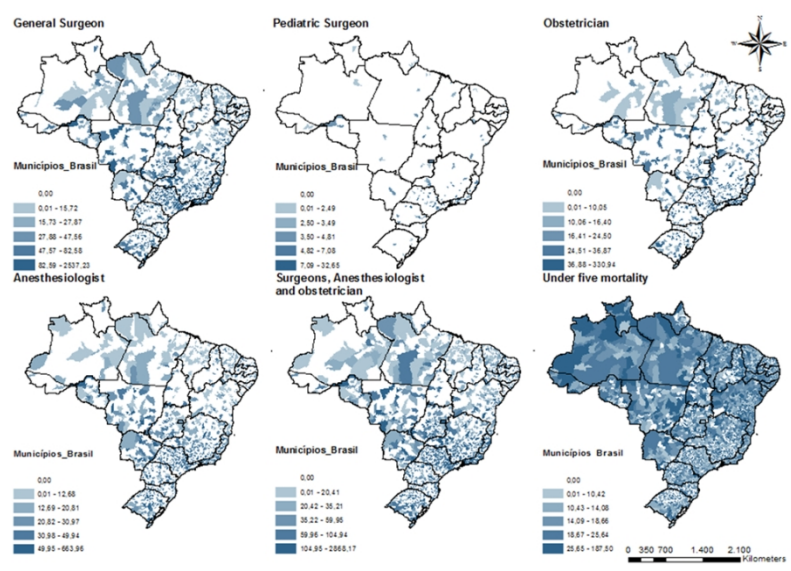

338x190mm (96 x 96 DPI)

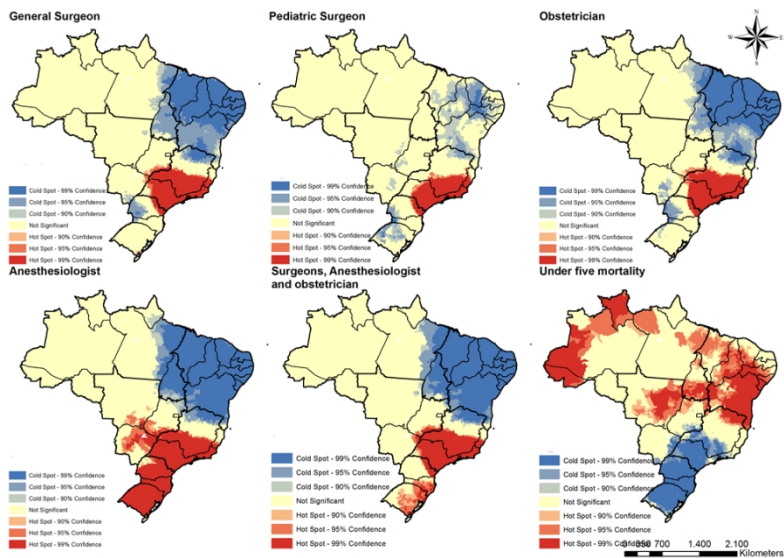

338x190mm (96 x 96 DPI)



1  
2  
3  
4  
5  
6  
7  
8  
9  
10  
11  
12  
13  
14  
15  
16  
17  
18  
19  
20  
21  
22  
23  
24  
25  
26  
27  
28  
29  
30  
31  
32  
33  
34  
35  
36  
37  
38  
39  
40  
41  
42  
43  
44  
45  
46  
47  
48  
49  
50  
51  
52  
53  
54  
55  
56  
57  
58  
59  
60

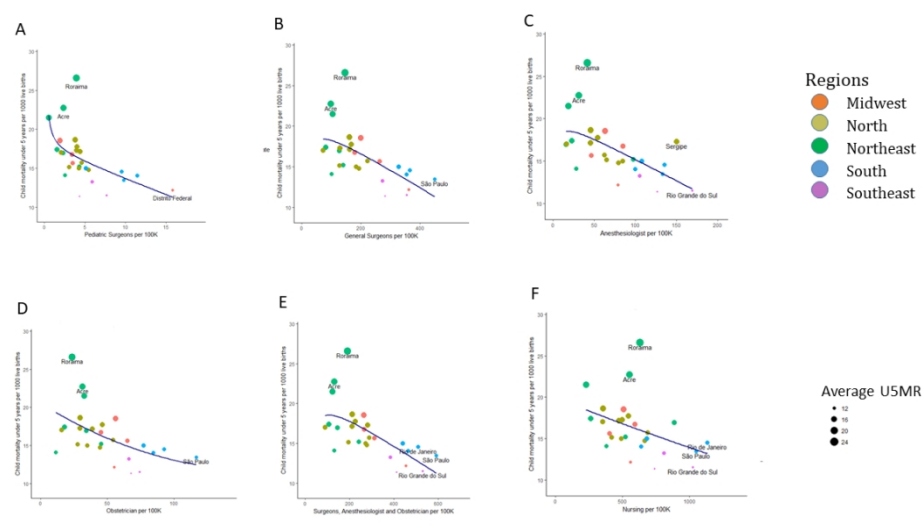

Fig6

338x190mm (96 x 96 DPI)

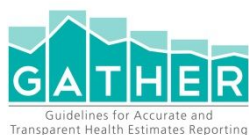

## Checklist of information that should be included in new reports of global health estimates

| Item #                                                                                                | Checklist item                                                                                                                                                                                                                                                                                                                                                                            | Reported on page # |
|-------------------------------------------------------------------------------------------------------|-------------------------------------------------------------------------------------------------------------------------------------------------------------------------------------------------------------------------------------------------------------------------------------------------------------------------------------------------------------------------------------------|--------------------|
| <b>Objectives and funding</b>                                                                         |                                                                                                                                                                                                                                                                                                                                                                                           |                    |
| 1                                                                                                     | Define the indicator(s), populations (including age, sex, and geographic entities), and time period(s) for which estimates were made.                                                                                                                                                                                                                                                     | 5                  |
| 2                                                                                                     | List the funding sources for the work.                                                                                                                                                                                                                                                                                                                                                    | 2                  |
| <b>Data Inputs</b>                                                                                    |                                                                                                                                                                                                                                                                                                                                                                                           |                    |
| <i>For all data inputs from multiple sources that are synthesized as part of the study:</i>           |                                                                                                                                                                                                                                                                                                                                                                                           |                    |
| 3                                                                                                     | Describe how the data were identified and how the data were accessed.                                                                                                                                                                                                                                                                                                                     | 5-6                |
| 4                                                                                                     | Specify the inclusion and exclusion criteria. Identify all ad-hoc exclusions.                                                                                                                                                                                                                                                                                                             | 5-6                |
| 5                                                                                                     | Provide information on all included data sources and their main characteristics. For each data source used, report reference information or contact name/institution, population represented, data collection method, year(s) of data collection, sex and age range, diagnostic criteria or measurement method, and sample size, as relevant.                                             | 5-7                |
| 6                                                                                                     | Identify and describe any categories of input data that have potentially important biases (e.g., based on characteristics listed in item 5).                                                                                                                                                                                                                                              | 10                 |
| <i>For data inputs that contribute to the analysis but were not synthesized as part of the study:</i> |                                                                                                                                                                                                                                                                                                                                                                                           |                    |
| 7                                                                                                     | Describe and give sources for any other data inputs.                                                                                                                                                                                                                                                                                                                                      | NA                 |
| <i>For all data inputs:</i>                                                                           |                                                                                                                                                                                                                                                                                                                                                                                           |                    |
| 8                                                                                                     | Provide all data inputs in a file format from which data can be efficiently extracted (e.g., a spreadsheet rather than a PDF), including all relevant meta-data listed in item 5. For any data inputs that cannot be shared because of ethical or legal reasons, such as third-party ownership, provide a contact name or the name of the institution that retains the right to the data. | 7                  |
| <b>Data analysis</b>                                                                                  |                                                                                                                                                                                                                                                                                                                                                                                           |                    |
| 9                                                                                                     | Provide a conceptual overview of the data analysis method. A diagram may be helpful.                                                                                                                                                                                                                                                                                                      | 5-7                |
| 10                                                                                                    | Provide a detailed description of all steps of the analysis, including mathematical formulae. This description should cover, as relevant, data cleaning, data pre-processing, data adjustments and weighting of data sources, and mathematical or statistical model(s).                                                                                                                   | 5-7                |
| 11                                                                                                    | Describe how candidate models were evaluated and how the final model(s) were selected.                                                                                                                                                                                                                                                                                                    | 5-7                |
| 12                                                                                                    | Provide the results of an evaluation of model performance, if done, as well as the results of any relevant sensitivity analysis.                                                                                                                                                                                                                                                          | 5-7                |
| 13                                                                                                    | Describe methods for calculating uncertainty of the estimates. State which sources of uncertainty were, and were not, accounted for in the uncertainty analysis.                                                                                                                                                                                                                          | 5-7                |
| 14                                                                                                    | State how analytic or statistical source code used to generate estimates can be accessed.                                                                                                                                                                                                                                                                                                 | 5-7                |
| <b>Results and Discussion</b>                                                                         |                                                                                                                                                                                                                                                                                                                                                                                           |                    |
| 15                                                                                                    | Provide published estimates in a file format from which data can be efficiently extracted.                                                                                                                                                                                                                                                                                                | 7                  |
| 16                                                                                                    | Report a quantitative measure of the uncertainty of the estimates (e.g. uncertainty intervals).                                                                                                                                                                                                                                                                                           | 7-9                |
| 17                                                                                                    | Interpret results in light of existing evidence. If updating a previous set of estimates, describe the reasons for changes in estimates.                                                                                                                                                                                                                                                  | 7-11               |
| 18                                                                                                    | Discuss limitations of the estimates. Include a discussion of any modelling assumptions or data limitations that affect interpretation of the estimates.                                                                                                                                                                                                                                  | 10                 |

This checklist should be used in conjunction with the GATHER statement and Explanation and Elaboration document, found on [gather-statement.org](http://gather-statement.org)

# BMJ Open

## Towards Defining the Surgical Workforce for Children: A Geospatial Analysis in Brazil

|                                 |                                                                                                                                                                                                                                                                                                                                                                                                                                                                                                                                                                                                                                                                                                          |
|---------------------------------|----------------------------------------------------------------------------------------------------------------------------------------------------------------------------------------------------------------------------------------------------------------------------------------------------------------------------------------------------------------------------------------------------------------------------------------------------------------------------------------------------------------------------------------------------------------------------------------------------------------------------------------------------------------------------------------------------------|
| Journal:                        | <i>BMJ Open</i>                                                                                                                                                                                                                                                                                                                                                                                                                                                                                                                                                                                                                                                                                          |
| Manuscript ID                   | bmjopen-2019-034253.R1                                                                                                                                                                                                                                                                                                                                                                                                                                                                                                                                                                                                                                                                                   |
| Article Type:                   | Original research                                                                                                                                                                                                                                                                                                                                                                                                                                                                                                                                                                                                                                                                                        |
| Date Submitted by the Author:   | 04-Dec-2019                                                                                                                                                                                                                                                                                                                                                                                                                                                                                                                                                                                                                                                                                              |
| Complete List of Authors:       | Rocha, Thiago; Duke University, Global Health Institute<br>Vissoci, Joao; Duke University, Global Health Institute<br>Rocha, Nubia; Federal University of Minas Gerais<br>Poenaru, Dan; Montreal Children's Hospital Research Institute, Pediatric Surgery<br>Shrime, Mark; Harvard Medical School, Department of Global Health and Social Medicine; Massachusetts Eye and Ear Infirmary, Department of Otolaryngology and Head and Neck Surgery<br>Smith, Emily; Baylor University, Health, Human Performance, and Recreation; Duke University, Duke University Global Health Institute<br>Rice, Henry; Duke University, Global Health Institute; Duke University Medical Center, Department of Surgery |
| <b>Primary Subject Heading</b>: | Global health                                                                                                                                                                                                                                                                                                                                                                                                                                                                                                                                                                                                                                                                                            |
| Secondary Subject Heading:      | Health services research, Public health                                                                                                                                                                                                                                                                                                                                                                                                                                                                                                                                                                                                                                                                  |
| Keywords:                       | Epidemiology < TROPICAL MEDICINE, PAEDIATRICS, SURGERY                                                                                                                                                                                                                                                                                                                                                                                                                                                                                                                                                                                                                                                   |
|                                 |                                                                                                                                                                                                                                                                                                                                                                                                                                                                                                                                                                                                                                                                                                          |

SCHOLARONE™  
Manuscripts



I, the Submitting Author has the right to grant and does grant on behalf of all authors of the Work (as defined in the below author licence), an exclusive licence and/or a non-exclusive licence for contributions from authors who are: i) UK Crown employees; ii) where BMJ has agreed a CC-BY licence shall apply, and/or iii) in accordance with the terms applicable for US Federal Government officers or employees acting as part of their official duties; on a worldwide, perpetual, irrevocable, royalty-free basis to BMJ Publishing Group Ltd ("BMJ") its licensees and where the relevant Journal is co-owned by BMJ to the co-owners of the Journal, to publish the Work in this journal and any other BMJ products and to exploit all rights, as set out in our [licence](#).

The Submitting Author accepts and understands that any supply made under these terms is made by BMJ to the Submitting Author unless you are acting as an employee on behalf of your employer or a postgraduate student of an affiliated institution which is paying any applicable article publishing charge ("APC") for Open Access articles. Where the Submitting Author wishes to make the Work available on an Open Access basis (and intends to pay the relevant APC), the terms of reuse of such Open Access shall be governed by a Creative Commons licence – details of these licences and which [Creative Commons](#) licence will apply to this Work are set out in our licence referred to above.

Other than as permitted in any relevant BMJ Author's Self Archiving Policies, I confirm this Work has not been accepted for publication elsewhere, is not being considered for publication elsewhere and does not duplicate material already published. I confirm all authors consent to publication of this Work and authorise the granting of this licence.

## Towards Defining the Surgical Workforce for Children: A Geospatial Analysis in Brazil

Thiago Augusto Hernandez Rocha,<sup>1,2</sup> João R.N. Vissoci,<sup>1,2,3,4</sup> Núbia Cristina da Silva Rocha,<sup>5</sup> Dan Poenaru,<sup>6</sup> Mark G. Shrime,<sup>7</sup> Emily R. Smith,<sup>1,8</sup> Henry E. Rice,<sup>1</sup> on behalf of the Global Initiative for Children's Surgery

Affiliations and Addresses: <sup>1</sup>Duke Global Health Institute, Durham, NC, USA; <sup>2</sup>Federal University of Minas Gerais, School of Economics, Center of Post-Graduate and Research in Administration, Belo Horizonte, Minas Gerais, Brazil; <sup>3</sup>Graduate program in Health Sciences, State University of Maringá, Maringá, PR, Brazil; <sup>4</sup>Division of Global Neurosurgery and Neurology, Duke University Medical Center, Durham, NC, USA; <sup>5</sup>Federal University of Minas Gerais, Faculty of Economics, Observatory of Human Resources in Health, Belo Horizonte, Minas Gerais, Brazil; <sup>6</sup>Division of Pediatric General and Thoracic Surgery, The Montreal Children's Hospital, McGill University Health Centre, Montreal, QC, Canada; <sup>7</sup>Center for Global Surgery Evaluation, Massachusetts Eye and Ear Infirmary, and the Departments of Global Health and Social Medicine and of Otolaryngology, Harvard Medical School, Boston, Massachusetts, USA; <sup>8</sup>Department of Public Health, Robbins College of Health and Human Services, Baylor University, Waco, TX, USA.

Correspondence: Henry E. Rice, MD, Duke Global Health Institute, Box 3815, Duke University Medical Center, Durham, NC, 27710, USA. Phone (919)-681-5077, Fax (919)-681-8353, email: [henry.rice@duke.edu](mailto:henry.rice@duke.edu)

Key Words (MeSH headings): Surgery, anesthesia, Brazil, workforce, global health

Abstract Length: 290 words

Text Length: 2963 words

Table Count: 2

Figure Count: 6

Reference Count: 29

**ABSTRACT**

**Objectives:** The optimal size of the health workforce for children's surgical care around the world remains poorly defined. The goal of this study was to characterize the surgical workforce for children across Brazil, and to identify associations between the surgical workforce and measures of childhood health.

**Design:** This study is an ecological, cross-sectional analysis using data from the Brazil public health system (*Sistema Único de Saúde*).

**Settings and Participants:** We collected data on the surgical workforce (pediatric surgeons, general surgeons, anesthesiologists, and nursing staff), perioperative mortality rate (POMR), and under-5 mortality rate (U5MR) across Brazil for 2015.

**Primary and Secondary Outcome Measures:** We performed descriptive analyses, and identified associations between the workforce and U5MR using geospatial analysis (Getis-Ord-Gi analysis, spatial cluster analysis, and linear regression models).

**Findings:** There were 39,926 general surgeons, 856 pediatric surgeons, 13,243 anesthesiologists, and 103,793 nurses across Brazil in 2015. The U5MR ranged from 11-26 deaths/1,000 live births and the POMR ranged from 0·11-0·17 deaths/100,000 children across the country. The surgical workforce is inequitably distributed across the country, with the wealthier South and Southeast regions having a higher workforce density as well as lower U5MR than the poorer North and Northeast regions. Using linear regression, we found an inverse relationship between the surgical workforce density and U5MR. An U5MR of 15 deaths/1,000 births across Brazil is associated with a workforce level of 5 pediatric surgeons, 200 surgeons, 100 anesthesiologists, or 700 nurses/100,000 children.

**Conclusions:** We found wide disparities in the surgical workforce and childhood mortality across Brazil, with both directly related to socioeconomic status. Areas of increased surgical workforce are associated with lower U5MR. Strategic investment in the surgical workforce may be required to attain optimal health outcomes for children in Brazil, particularly in rural regions.

**Funding:** None

## ARTICLE SUMMARY

### STRENGTHS AND LIMITATIONS OF THIS STUDY

#### Strengths

- Use of geospatial analysis allows precise definition of associations between the surgical workforce and under-5 mortality rate (U5MR) across Brazil.
- Analysis can demonstrate an inverse relationship between the surgical workforce and U5MR, allowing for location of areas of increased workforce which are associated with lower U5MR levels.
- Geospatial tools can confirm disparities in the surgical workforce as well as U5MR across Brazil, and support modeling to define the relationship between the surgical workforce and U5MR.

#### Limitations

- Our findings of an association between surgical workforce and U5MR does not demonstrate causation, as many confounding factors and modifiers other than surgical disease impact the U5MR
- Although our findings of an association between surgical workforce and U5MR does not demonstrate causation.

## INTRODUCTION

Health care is workforce intensive, and an adequate level of human resources is essential to maintain strong health systems. Discrepancies between local health needs and the health workforce leads to clinical errors, wastage of resources, and increased patient mortality and morbidity.<sup>1</sup> For surgical care, the workforce is grossly inadequate and inequitably distributed in many low- and middle-income countries (LMICs), with rural areas disproportionately affected.<sup>2,3</sup>

Studies from the Lancet Commission on Global Surgery (LCoGS) have proposed a density of 20-40 specialist physicians (surgeons, anesthesiologists, or obstetricians, SAO) per 100,000 general population to attain desired health outcomes, such as perioperative mortality rate (POMR).<sup>2,4</sup> However, surgical care for children is fundamentally different from adult care, with surgical resources provided through multiple tiers in a national health system in proportion to population needs and surgical complexity required.<sup>5</sup> In these complex health systems, the optimal surgical workforce for children remains poorly defined.

Brazil offers a rich environment to closely examine the health workforce, as it has extremely heterogeneous geography, health infrastructure, and socioeconomic status across the country (GINI index 53.3 in 2017).<sup>6,7</sup> Brazil has a large public health system (*Sistema Único de Saúde, SUS*) and maintains several publicly available datasets (DATASUS).<sup>6,8</sup> Efforts to reduce health disparities across the five Brazil regions (North, Northeast, Midwest, Southeast, and South) have made great strides in recent years, particularly through workforce expansion in primary care.<sup>9</sup>

Previous geospatial analysis by ourselves and others have identified wide disparities in surgical care across Brazil.<sup>10,11</sup> Facilities providing surgical care for children are inequitably distributed across the country, with higher density of infrastructure and surgical access per population unit associated with areas of higher socioeconomic status.<sup>10</sup> Spatial cluster analysis demonstrated a higher under-5 mortality rate (U5MR) in the poorer North, Northeast, and Midwest regions compared to the wealthier Southeast and South regions, although the POMR for a proxy set of children's conditions does not vary across the country.<sup>10</sup> Increased access to surgical care is associated with a lower U5MR, and access to surgical care differs by geographic region independent of socioeconomic status.

The goals of this study are to characterize the surgical workforce for children in the public health system in Brazil using geospatial analysis and to identify associations between the surgical workforce and childhood mortality rates. Through this analysis, we hope to provide an assessment of Brazil's surgical workforce, identify disparities in workforce distribution, and estimate the required surgical workforce to obtain desired health outcomes for children.



## METHODS

This study is an ecological, cross-sectional, geospatial analysis using data from the Brazil public health system. Brazil is composed of 5,570 municipalities across the union of the Federal District and 26 states, which are distributed across five regions (Midwest, North, Northeast, South, and Southeast). We collected data on all children < 15 years of age undergoing a surgical procedure from 2010 to 2015 across Brazil using datasets from DATASUS (see Table 1 for all datasets and study timeframes). Auxiliary data were collected from databases from the World Bank and the Brazilian Institute of Geography and Statistics (IBGE).<sup>8</sup> We used several tools of geospatial analysis to explore relationships between surgical workforce, POMR, and U5MR. All health estimates were summarized in line with the GATHER statement.<sup>12</sup>

We extracted demographic and socioeconomic indicators from Brazilian Institute of Geography and Statistics (IBGE).<sup>13</sup> We used this data along with the Brazilian gross domestic product (GDP) to classify municipalities according to income groups as high income, upper-middle income, or lower-middle income as defined by the 2017 World Bank criteria of gross national income (GNI) per capita adjusted to US dollars (low income: GNI per capita \$1,005 or less; lower middle-income: GNI per capita between \$1,006 and \$3,955; upper middle-income: GNI per capita between \$3,956 and \$12,235; high-income > \$12,235) (Fig 1).<sup>14</sup>

### **Surgical workforce density**

We summarized data on the surgical workforce at the municipality, state, and regional levels. We summarized several workforce roles, including general surgeons, pediatric surgeons, anesthesiologists, obstetricians, and nurses, using professional role definitions from the CNES. The CNES keeps a record of the appointment of all health providers at public health facilities. The density of each profession was weighted per 100,000 children. For comparison to common surgical workforce metrics used in the Lancet Commission on Global Surgery,<sup>2-4</sup> we also summarized the density of surgeons, anesthesiologists, and obstetricians (SAO).

### **Under-5 child mortality rate (U5MR) and perioperative mortality rate (POMR)**

We summarized annual all-cause under-5 pediatric mortality rates (U5MR) at the regional and municipality level using data from the Brazilian Mortality Information System database (SIM), which collects data on all deaths by age, sex, cause, and residence.<sup>8</sup> The U5MR was calculated using methods of the Inter Agency Group for Mortality Estimation (IGME), and was expressed as deaths per 1,000 live births.<sup>15</sup>

1  
2  
3 We collected procedure-based perioperative mortality rate (POMR) from the DATASUS  
4 Hospitalization Information System database (SIH) using the procedure codes for a proxy set of  
5 general surgical procedures. This set was based on the Optimal Resources for Children's  
6 Surgery (OReCS) document of the Global Initiative for Children's Surgery, which specifies  
7 representative surgical procedures to assess the delivery of surgical care within a national health  
8 system.<sup>5</sup> These five procedures included appendectomy, colostomy, hernia repair, laparotomy,  
9 and abdominal wall reconstruction for gastroschisis, omphalocele, or other indication. The SIH  
10 defines perioperative mortality as any death occurring during any surgical procedure. We  
11 summarized procedure-specific POMR at the regional level across the country.  
12  
13  
14  
15  
16  
17

18 Note that due to differences in the data quality,<sup>10</sup> we limited analysis of the surgical workforce to  
19 use of U5MR as the outcome metric. We chose not to use POMR, as the SIH dataset only  
20 records deaths occurring during operative procedures and thus likely far underestimates the true  
21 POMR, which is generally accepted as within 30 days of surgery.<sup>16</sup> We recognize that U5MR  
22 measures both surgical and non-surgical causes of child mortality, although we chose to use it for  
23 analysis of associations between the surgical workforce and childhood health as it is a widely  
24 used measure of health system strength for children.  
25  
26  
27  
28  
29

### 30 **Data analysis**

31  
32  
33 All analyses were performed using the municipality as the main observation unit. We summarized  
34 descriptive outcomes at the municipality, state, and regional levels. Descriptive statistics were  
35 used to report the mean and standard deviation of workforce variables. The density of the  
36 surgical workforce and U5MR were displayed using geospatial choropleth maps. Geographic  
37 mapping was used to identify the distribution of each indicator within a spatial area.<sup>17</sup> We used a  
38 Getis-Ord Gi analysis to depict the spatial autocorrelation within each indicator (workforce density  
39 and U5MR). We identified hot spots (red areas) depicting clusters of municipalities with adjacent  
40 municipalities with high values for a given indicator (workforce density or U5MR), and cold spots  
41 (blue areas) depicting areas of adjacent clusters with low values for each indicator. Yellow areas  
42 mark locations where no clustering was observed. Geographic mapping was used to identify the  
43 distribution of each indicator within a spatial area.  
44  
45  
46  
47  
48  
49

50  
51 To identify potential associations between the surgical workforce and U5MR, we used linear  
52 regression on the aggregated data on the state level, adjusting for regional distribution. Scatter  
53 plots were built to graphically depict the association between workforce and U5MR. Each point in  
54 the graphic was proportional to the average U5MR (per 1,000 live births), with display by state as  
55 well as by region level. We also performed quadratic and splines regression analysis, but the  
56  
57  
58  
59  
60

1  
2  
3 linear models showed better fit to the data, assessed in comparison using ANOVAs and residual  
4 evaluation.  
5

6  
7 Further analysis evaluated the association between workforce and U5MR accounting for the  
8 spatial heterogeneity, using Moran's I bivariate spatial autocorrelation between each indicator.  
9 For our study, we identified High-High spots (red areas) depicting clusters of municipalities with  
10 high workforce adjacent municipalities with high values for a U5MR, and Low-Low spots (blue  
11 areas) depicting areas of adjacent clusters with low values for each indicator. High-Low (light red  
12 areas) and Low-High (light blue areas) marked locations cluster of high in one indicator was  
13 adjacent to a low in the other.  
14  
15  
16  
17

### 18 19 **Patient and public involvement**

20  
21  
22 As an ecological study, there was no direct patient involvement with this research. However,  
23 there is public interest in addressing challenges with the surgical care of children in Brazil. We  
24 used anonymized publically available datasets to address these research questions. All research  
25 findings will be disseminated to the public and health community in Brazil through publication,  
26 academic meetings, and social media.  
27  
28  
29

### 30 31 **Data sharing statement**

32  
33 All data used for this analysis were obtained from the open access DATASUS system, from the  
34 Brazilian Ministry of Health. Data can be obtained, freely, from: <http://tabnet.datasus.gov.br/>.  
35  
36  
37  
38  
39

## 40 41 **RESULTS**

42  
43 We found that there were 39,926 general surgeons, 856 pediatric surgeons, 13,243  
44 anesthesiologists, 103,793 nurses, and 9,674 obstetricians across Brazil in 2015. During the  
45 same year, there were 43,045 reported deaths in children under five years of age in Brazil, with  
46 the U5MR ranging between 11-26 deaths/1,000 live births across states. The POMR for the proxy  
47 set of surgical procedures ranged from 0·11-0·17 deaths/100,000 children across regions.  
48  
49  
50

51  
52 By use of scatter plots, we developed a set of linear regression models to define the association  
53 between the density of surgical workforce at the state level and U5MR (Fig 2A-F). Using linear  
54 regression, we e found all professional roles had a direct relationship between workforce density  
55 and U5MR (Table 2). However, when adjusting the models by the interaction of workforce density  
56 and region of the country, we noticed that some of the associations had lower coefficients and  
57  
58  
59  
60

1  
2  
3 were not significant, suggesting that the association between workforce and U5MR is dependent  
4 on the geographic and social context.  
5

### 6 7 **Disparities in the surgical workforce and U5MR across Brazil** 8

9  
10 The surgical workforce for children in Brazil is unequally distributed across the country, with the  
11 South and Southeast regions having a higher density of all professional roles, while the North and  
12 Northeast regions have a lower density of each role (Fig 3). We found an inverse pattern of  
13 disparities in U5MR across the country,. The South and Southeast regions had the lowest U5MR.  
14 In contrast, the North and Northeast regions had higher U5MR (Fig 4).  
15  
16

17  
18 At a municipality level, we found wide disparities in the workforce density as well as U5MR across  
19 Brazil, with inequities even within states (Fig 5). Several municipalities did not have even one  
20 general surgeon, pediatric surgeon, obstetrician, or anesthesiologist. Some wealthier parts of the  
21 North and Northeast regions showed high inequities in workforce distribution, with the workforce  
22 preferentially localized in areas around the state capitals. The high areas of workforce distribution  
23 was similar to the patterns of low U5MR seen at the municipality level.  
24  
25  
26  
27

### 28 29 **Relationship between surgical workforce density and U5MR** 30

31  
32 We found a direct association between the surgical workforce and U5MR across Brazil, with  
33 higher density of each professional role associated with lower U5MR across regions (Fig 6, Table  
34 2). This pattern is consistent across workforce roles (surgeon, anesthesiologist, nursing, etc.),  
35 although there are some variations in the distribution patterns across the country. For example, in  
36 the South and Southeast, we found the highest density of pediatric surgeons as well as the  
37 lowest levels of U5MR, although this pattern was not seen in the Federal District, where there  
38 was a high density of all workforce roles as well as higher levels of U5MR compared to  
39 surrounding regions. The Federal district is where the Brazilian government is located, and the  
40 density of the surgical workforce in this state-city was higher than in all other states.  
41  
42  
43  
44  
45

## 46 47 **DISCUSSION** 48

49  
50 As surgical care is an essential component of functioning health care systems, there is a need to  
51 improve our understanding of the surgical workforce for children. Brazil has wide disparities  
52 insocioeconomic status and health care delivery.<sup>18,19</sup> Our previous work has shown disparities in  
53 the density of delivery and infrastructure for surgical care for children per population unit across  
54 Brazil, with areas of higher socioeconomic status associated with increased delivery of surgical  
55 care.<sup>10</sup> Although Brazil does have widely variable geography, these disparities are corrected for  
56 population density, and therefore reflect underlying disparities in health access. Our current study  
57  
58  
59  
60

1  
2  
3 demonstrates disparities in the surgical workforce across the country, with a higher workforce  
4 density per population unit found in areas of higher socioeconomic status. As well, increased  
5 surgical workforce density is associated with areas of lower U5MR, suggesting that an adequate  
6 and equitable surgical workforce is essential for support of high-quality health care for children.  
7  
8

9  
10 Disparities in surgical care for adults have been previously noted in Brazil as well as other  
11 countries, although disparities in the surgical care for children remain poorly understood. Reports  
12 from the Lancet Commission on Global Surgery have shown an association between the density  
13 of surgeons, anesthesiologists, and obstetricians (SAO) and the rate of surgical procedures or  
14 perioperative mortality rates.<sup>2-4</sup> Our data aligns with recent analyses of surgical care for adults in  
15 Brazil, which showed wide disparities in manpower and surgical care.<sup>11,20</sup> The Brazilian  
16 government has long recognized challenges with health care delivery across the country, and  
17 have implemented several programs to increase primary care access in rural areas.<sup>6,9,21</sup>  
18  
19

20  
21 The POMR is often used to gauge the quality of a surgical system,<sup>16</sup> although we suggest that  
22 metrics of overall childhood health such as U5MR may offer an alternative, and potentially even  
23 more valuable metric to guide manpower planning. First, given the increasing emphasis on  
24 surgical care as an integral part of a comprehensive health system, associations between each  
25 aspect of the health workforce and overall measures of population health may be the most  
26 appropriate measure of manpower across an entire health system, including the surgical  
27 workforce.<sup>16</sup> For example, neonates or children with cancer often require surgical care, and an  
28 adequate surgical workforce is essential to ensure high-quality outcomes for these children.  
29 Second, despite interest around the world for collection of perioperative mortality rates, data  
30 quality for POMR continues to be challenging in many settings.<sup>22</sup> Our previous work in Brazil  
31 suggests that data quality for POMR is too poor to allow for analysis of the surgical workforce.<sup>10,16</sup>  
32 Third, the United Nations and the World Health Organization have identified several indicators to  
33 evaluate health interventions in children, including the U5MR, rate of growth stunting,  
34 immunization coverage, and prevalence of common childhood diseases.<sup>23</sup> These metrics are  
35 routinely collected around the world, and our analysis suggests that strategic expansion of the  
36 surgical workforce can be guided by these widely collected metrics. Finally, we confirmed an  
37 association between the nursing workforce and U5MR, as few analyses have examined the  
38 nursing workforce requirements for surgical care.  
39  
40  
41  
42  
43  
44  
45  
46  
47  
48  
49  
50  
51  
52

53 To assist with policy development, geospatial analysis can identify priority regions of workforce  
54 needs. The sequence of steps in our analysis may be generalizable to other countries to guide  
55 scale-up of the surgical workforce to desired levels of health outcomes. For example, we found  
56 that U5MR of 15 deaths/1,000 births across Brazil is associated with an approximate workforce  
57 level of 5 pediatric surgeons, 200 surgeons, 100 anesthesiologists, or 700 nurses/100,000  
58  
59  
60

1  
2  
3 children. Geospatial analyses has help guide health workforce expansion in Thailand,<sup>24</sup> as well as  
4 in some countries in sub-Saharan Africa.<sup>25</sup> However, we caution that the workforce associations  
5 in Brazil may not be applicable to other countries. As well, geospatial analysis requires access to  
6 high quality national datasets, which remains problematic in many countries around the world.  
7  
8

9  
10 The areas of Brazil with lower socioeconomic status remain challenging environments for health  
11 care, where there is a long history of difficulties with retention of health care professionals.<sup>18,19</sup>  
12 Our findings align with studies of adult surgical workforce in Brazil, which have shown inequities  
13 in the density of SAO professionals across the country, with rural regions disproportionately  
14 affected.<sup>26</sup> Similar to many counties around the world, the rural areas in Brazil have high levels of  
15 poverty and a scarcity of health infrastructure.<sup>27,28</sup> Brazil has successfully increased access to the  
16 primary care workforce in rural areas through the *Mais Médicos* program,<sup>29</sup> and our findings  
17 suggest that similar expansion of the surgical workforce may improve the health of children.  
18  
19

20  
21 As with any population-based study, our work has several limitations. First, our findings of an  
22 association between surgical workforce and U5MR do not demonstrate causation. We recognize  
23 that many confounders other than surgical workforce impacts the U5MR (such as non-surgical  
24 disease, non-surgical workforce, etc.). However, we view surgical care as a core component of a  
25 functional health system, and therefore association between the surgical workforce and U5MR  
26 can help guide workforce planning. Although our analysis did not account for detailed study of the  
27 confounding and modifying variables which impact the U5MR, further discernment of which  
28 components of a health workforce are most important for childhood health is a critical question  
29 that merits further analysis. Second, there is a lack of consensus in geospatial analysis about  
30 how the density of professionals should be weighted regarding different populations (i.e. overall  
31 population, child population, etc.), although we chose to weigh by child population. Finally, we  
32 recognize that the surgical workforce includes many type of subspecialists that were not included  
33 in our analysis.  
34  
35

36  
37 In conclusion, we found that the surgical workforce for children is inadequate and inequitably  
38 distributed across Brazil, suggesting that strategic investment in the surgical workforce is required  
39 to support high-quality and equitable health care for children. There is a direct relation between  
40 the surgical workforce and U5MR across Brazil, with higher levels of the surgical workforce  
41 associated with improved U5MR. These findings have several policy implications to improve the  
42 health of children in Brazil:  
43  
44

- 45  
46  
47  
48  
49  
50  
51  
52  
53  
54  
55  
56 • Increased investment in the surgical workforce is required to support the health of children  
57 in Brazil, particularly in rural regions  
58  
59  
60



- Identification of associations between the workforce and measures of population health (such as U5MR) may be a valuable tool to define surgical workforce levels in LMICs
- Definition of workforce indicators is particularly challenging for children's surgical care given the complexity of care across different levels of national health systems
- Geospatial analysis can help define the required surgical workforce to attain desired population health goals, and may be generalizable across other LMICs

## ACKNOWLEDGEMENTS

- We want to thank the Global Initiative for Children's Surgery (GICS) for its support of this work. GICS ([www.globalchildrensurgery.org](http://www.globalchildrensurgery.org)) is a network of children's surgical and anesthesia providers from low-, middle-, and high-income countries collaborating for the purpose of improving the quality of surgical care for children globally. There was no external funding source for this study.

## FOOTNOTES

### CONTRIBUTORS

TAHR, JRNV, and HER had the initial idea for this analysis. TAHR, JRNV, NCS, and HER performed the initial analysis and wrote the first draft. The analysis and manuscript were completed and revised in collaboration with DP, MGS, and ERS. All co-authors read and approved the final manuscript.

### DECLARATION OF INTERESTS

We declare no competing interests.

### IRB APPROVAL

Not required.

## REFERENCES

1. Lopes MA, Almeida AS, Almada-Lobo B. Handling healthcare workforce planning with care: where do we stand? *Hum Resour Health* 2015;**13**:38. doi: 10.1186/s12960-015-0028-0 [published Online First: 2015/05/25]
2. Meara JG, Leather AJ, Hagander L, *et al.* Global Surgery 2030: Evidence and solutions for achieving health, welfare, and economic development. *Lancet* 2015;**386**(9993):569-624.
3. Holmer H, Lantz A, Kunjumen T, *et al.* Global distribution of surgeons, anaesthesiologists, and obstetricians. *Lancet Glob Health* 2015;**3 Suppl 2**:S9-11. doi: 10.1016/s2214-109x(14)70349-3 [published Online First: 2015/05/01]
4. Rose J, Weiser TG, Hider P, *et al.* Estimated need for surgery worldwide based on prevalence of diseases: a modeling strategy for the WHO Global Health Estimate. *Lancet Glob Health* 2015;**3**:Suppl 2:S13-20.
5. Goodman LF, St-Louis E, Yousef Y, *et al.* The Global Initiative for Children's Surgery: Optimal Resources for Improving Care. *Eur J Pediatr Surg* 2018;**28**(01):051-59. doi: 10.1055/s-0037-1604399 [published Online First: 14.08.2017]
6. Paim J, Travassos C, Almeida C, *et al.* The Brazilian health system: history, advances, and challenges. *Lancet* 2011;**377**(9779):1778-97. doi: 10.1016/s0140-6736(11)60054-8 [published Online First: 2011/05/13]
7. World Bank. GINI Index (World Bank estimate) Washington DC: World Bank; 2017 [Available from: <https://data.worldbank.org/indicator/si.pov.gini>.
8. Brasil. Departamento de Informática do SUS - DATASUS. Informações de Saúde (TABNET) 2015 [Available from: <http://www2.datasus.gov.br/DATASUS/index.php?area=02> Accessed June 2015.
9. Nunes BP, Thume E, Tomasi E, *et al.* Socioeconomic inequalities in the access to and quality of health care services. *Revista de saude publica* 2014;**48**(6):968-76. doi: 10.1590/s0034-8910.2014048005388 [published Online First: 2015/06/04]
10. Vissoci JRN, Ong CT, de Andrade L, *et al.* Disparities in surgical care for children across Brazil: use of geospatial analysis. *PLoS One* 2019;**14**(8):e0220959. doi: <https://doi.org/10.1371/journal.pone.0220959>
11. Massenburg BB, Saluja S, Jenny HE, *et al.* Assessing the Brazilian surgical system with six surgical indicators: a descriptive and modelling study. *BMJ Glob Health* 2017;**2**(2):e000226. doi: 10.1136/bmjgh-2016-000226 [published Online First: 2017/06/08]
12. Stevens GA, Alkema L, Black RE, *et al.* Guidelines for accurate and transparent health estimates reporting: the GATHER statement. *Lancet* 2016;**388**(10062):e19-e23. doi: 10.1016/s0140-6736(16)30388-9 [published Online First: 2016/07/03]
13. Instituto Brasileiro de Geografia e Estatística. Estatísticas sociodemográficas do Brasil 2014 [Available from: <http://www.ibge.gov.br/home/> accessed Accessed Jan 2018.
14. World Health Organization. World Health Statistics 2017: Monitoring Health for the SDGs, Sustainable Development Goals. Geneva: World Health Organization, 2017.
15. UNICEF, WHO, Bank TW, *et al.* Levels and trends of child mortality in 2006: estimates developed by the Inter-agency Group for Child Mortality Estimation New York 2007 [Available from: <http://mdgs.un.org/unsd/mdg/Resources/Attach/Capacity/Ind%204-1.pdf> accessed Sept 1 2018.



16. Watters DA, Hollands MJ, Gruen RL, *et al*. Perioperative mortality rate (POMR): A global indicator of access to safe surgery and anaesthesia. *World J Surg* 2015;**39**(4):856-64. doi: 10.1007/s00268-014-2638-4 [published Online First: 2014/05/21]
17. Getis A, Ord JK. The analysis of spatial association by use of distance statistics. *Geogr Anal* 1992;**24**(3):189-206. doi: doi:10.1111/j.1538-4632.1992.tb00261.x
18. Rocha TAH, da Silva NC, Amaral PV, *et al*. Access to emergency care services: a transversal ecological study about Brazilian emergency health care network. *Public Health* 2017;**153**:9-15.
19. Santos ASD, Duro SMS, Cade NV, *et al*. Quality of infant care in primary health services in Southern and Northeastern Brazil. *Revista de saude publica* 2018;**52**:11. doi: 10.11606/s1518-8787.2018052000186 [published Online First: 2018/02/08]
20. Alonso N, Massenburg BB, Galli R, *et al*. Surgery in Brazilian health care: Funding and physician distribution. *Rev Col Bras Cir* 2017;**44**(2):202-07.
21. Brazil. Programa Mais Medicos 2015 [Available from: <http://maismedicos.gov.br/> accessed Feb 1 2015.
22. Ng-Kamstra JS, Arya S, Greenberg SLM, *et al*. Perioperative mortality rates in low-income and middle-income countries: a systematic review and meta-analysis. *BMJ Glob Health* 2018;**3**(3):e000810. doi: 10.1136/bmjgh-2018-000810 [published Online First: 2018/07/11]
23. World Health Organization. Monitoring maternal, newborn and child health: Understanding key progress indicators. Geneva: World Health Organization, 2011.
24. Witthayapipopsakul W, Cetthakrikul N, Suphanchaimat R, *et al*. Equity of health workforce distribution in Thailand: an implication of concentration index. *Risk management and healthcare policy* 2019;**12**:13-22. doi: 10.2147/rmhp.s181174 [published Online First: 2019/02/23]
25. Agyepong IA, Sewankambo N, Binagwaho A, *et al*. The path to longer and healthier lives for all Africans by 2030: the Lancet Commission on the future of health in sub-Saharan Africa. *Lancet* 2018;**390**(10114):2803-59. doi: 10.1016/s0140-6736(17)31509-x [published Online First: 2017/09/18]
26. Scheffer MC, Guilloux AGA, Matijasevich A, *et al*. The state of the surgical workforce in Brazil. *Surgery* 2017;**161**(2):556-61. doi: 10.1016/j.surg.2016.09.008 [published Online First: 2017/03/28]
27. Bearden A, Fuller AT, Butler EK, *et al*. Rural and urban differences in treatment status among children with surgical conditions in Uganda. *PLoS One* 2018;**13**(11):e0205132. doi: 10.1371/journal.pone.0205132 [published Online First: 2018/11/02]
28. Smith ER, Vissoci JRN, Rocha TAH, *et al*. Geospatial analysis of unmet pediatric surgical need in Uganda. *J Pediatr Surg* 2017;**52**(10):1691-98. doi: 10.1016/j.jpedsurg.2017.03.045 [published Online First: 2017/04/22]
29. Lima RT, Fernandes TG, Balieiro AA, *et al*. Primary health care in Brazil and the Mais Medicos (More Doctors) Program: an analysis of production indicators. *Cien Saude Colet* 2016;**21**(9):2685-96. doi: 10.1590/1413-81232015219.15412016 [published Online First: 2016/09/23]

## FIGURE LEGENDS

Figure 1-Income group distribution of Brazilian municipalities. Socioeconomic data were extracted from Brazilian Institute of Geography and Statistic (IBGE), and used with the Brazilian gross domestic product to classify municipalities according to income groups as defined by the World Bank as high-income, upper-middle-income, or lower-middle-income. The map of Brazil was freely obtained in shapefile format (SHP) through online access to the website of the Brazilian Institute of Geography and Statistics (<https://mapas.ibge.gov.br/bases-e-referenciais/bases-cartograficas/malhas-digitais.html>). Reprinted from Vissoci et al.<sup>10</sup>

Figure 2 (A-F)-Association between the density of the surgical workforce (weighted per 100,000 children) and under-5 mortality rate (U5MR, per 1,000 live births) in each state across Brazil. Linear regression models were used to define associations between the workforce density and U5MR. The line resulting from each regression model was plotted using bivariate scatterplots. The size of each point in the graphic is proportional to the average U5MR for each state, with different colors used to summarize data by region.

Figure 3-The density (rate) of the surgical workforce for each professional role across Brazil as summarized by region. The density of each professional role is weighted per 100,000 children.

Figure 4- Under 5 mortality rates (U5MR, per 1,000 live births) across Brazil summarized by state as well as by region levels.

Figure 5- Spatial distribution of the surgical workforce density (weighted per 100,000 children) and under-5 mortality rate (U5MR, per 1,000 live births) at the municipality level. Hot spot cluster analysis of association between the surgical workforce density (weighted per 100,000 children) and under-5 mortality rate (U5MR, per 1,000 live births) across Brazil using Getis-Ord-Gi analysis.<sup>17</sup> Hot spots (red areas) depict clusters of municipalities with adjacent municipalities with high values for a given indicator (workforce density or U5MR), and cold spots (blue areas) depict clusters with an adjacent low values regarding each indicator. Yellow areas mark locations where no clustering was observed. Note that the scatterplots are not adjusted for spatial autocorrelation.

Figure 6- Association between the surgical workforce density (weighted per 100,000 children) and under-5 mortality rate (U5MR, per 1,000 live births) across Brazil using spatial correlation analysis. High-High areas (red areas) depict clusters of municipalities with high values for workforce adjacent municipalities with high values for a U5MR, and Low-Low areas (blue areas) depict clusters with an adjacent low values regarding each indicator.

**Table 1: Data Sources for Analysis**

| Source                                                 | Variables                                                                                                                                                                                                                   | Date Range | Data entries        | Scope                                                                                                                                                                                                                                                                      |
|--------------------------------------------------------|-----------------------------------------------------------------------------------------------------------------------------------------------------------------------------------------------------------------------------|------------|---------------------|----------------------------------------------------------------------------------------------------------------------------------------------------------------------------------------------------------------------------------------------------------------------------|
| DATASUS - Hospitalization information system (SIH)     | <ul style="list-style-type: none"> <li>Hospitalization procedures performed</li> <li>ICD code</li> <li>Age of patient</li> <li>Location of residence</li> <li>Costs associate to the procedure</li> <li>Hospital</li> </ul> | 2008-2015  | 267,248 procedures  | Appendectomy (ICD 10 0DTJ4ZZ, 0DTJ0ZZ)<br>Laparotomy (ICD 10 0WJP0ZZ)<br>Hernia (ICD 10 0YQ54ZZ, 0YQ64ZZ, 0YQ50ZZ, 0YQ60ZZ, 0WQF4ZZ, 0WUF07Z, 0WUF0KZ, 0BQR4ZZ, 0BQS4ZZ, 0BQR0ZZ, 0BQS0ZZ)<br>Colostomy (ICD 10 0WQFXZ2)<br>Abdominal wall reconstruction (ICD 10 0WQF0ZZ) |
| DATASUS - Mortality information system (SIM)           | <ul style="list-style-type: none"> <li>Deaths of patients under 14 years old</li> <li>The municipality of residence and of death</li> <li>Mortality rate by municipality</li> </ul>                                         | 2010-2015  | 326,459 deaths      | All deaths between 2010 and 2015                                                                                                                                                                                                                                           |
| CNES - National registration of health establishments  | <ul style="list-style-type: none"> <li>Geolocation</li> <li>Type of care provided</li> <li>Accreditation</li> </ul>                                                                                                         | 2014       | 6,498 hospitals     | District and referral level hospitals                                                                                                                                                                                                                                      |
| World Bank                                             | <ul style="list-style-type: none"> <li>Gross national income (GNI)</li> <li>Atlas index</li> <li>GNI per capita</li> <li>Income level classification</li> </ul>                                                             | 2010-2013  | 5565 municipalities | -                                                                                                                                                                                                                                                                          |
| IBGE - Brazilian institute of geography and statistics | <ul style="list-style-type: none"> <li>Pediatric population by municipality</li> <li>Gross domestic product (GDP)</li> <li>GDP per capita</li> </ul>                                                                        | 2008-2014  | 5565 municipalities | -                                                                                                                                                                                                                                                                          |

**Table 1.** Primary datasets used for analysis derived from the Brazilian public health system (*Sistema Único de Saúde, SUS*), which maintains several publicly available datasets (DATASUS). Auxiliary data collected from the World Bank and the Brazilian Institute of Geography and Statistic (IBGE).

|                                                   | Mean (SD)       | Unadjusted coefficient (SE) | Adjusted coefficient (SE) |
|---------------------------------------------------|-----------------|-----------------------------|---------------------------|
| General surgeon rate                              | 208.01 (103.93) | -0.02 (0.01)**              | -0.01 (0.01)              |
| Pediatric surgeon rate                            | 4.86 (3.38)     | -0.53 (0.17)**              | -0.32 (0.20)              |
| Obstetrician rate                                 | 48.95 (25.37)   | -0.07 (0.02)**              | -0.02 (0.05)              |
| Anesthesiologist rate                             | 74.34 (43.32)   | -0.05 (0.01)**              | -0.02 (0.02)              |
| Surgeons, Anesthesiologists and Obstetrician rate | 287.22 (140.70) | -0.02 (0.00)**              | -0.01 (0.01)              |

**Table 2.** Linear regression coefficients for the association between workforce and U5MR in Brazil, unadjusted and adjusted by region of the country. \*\*P-value < 0.01)

For peer review only

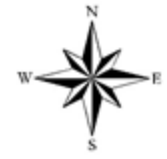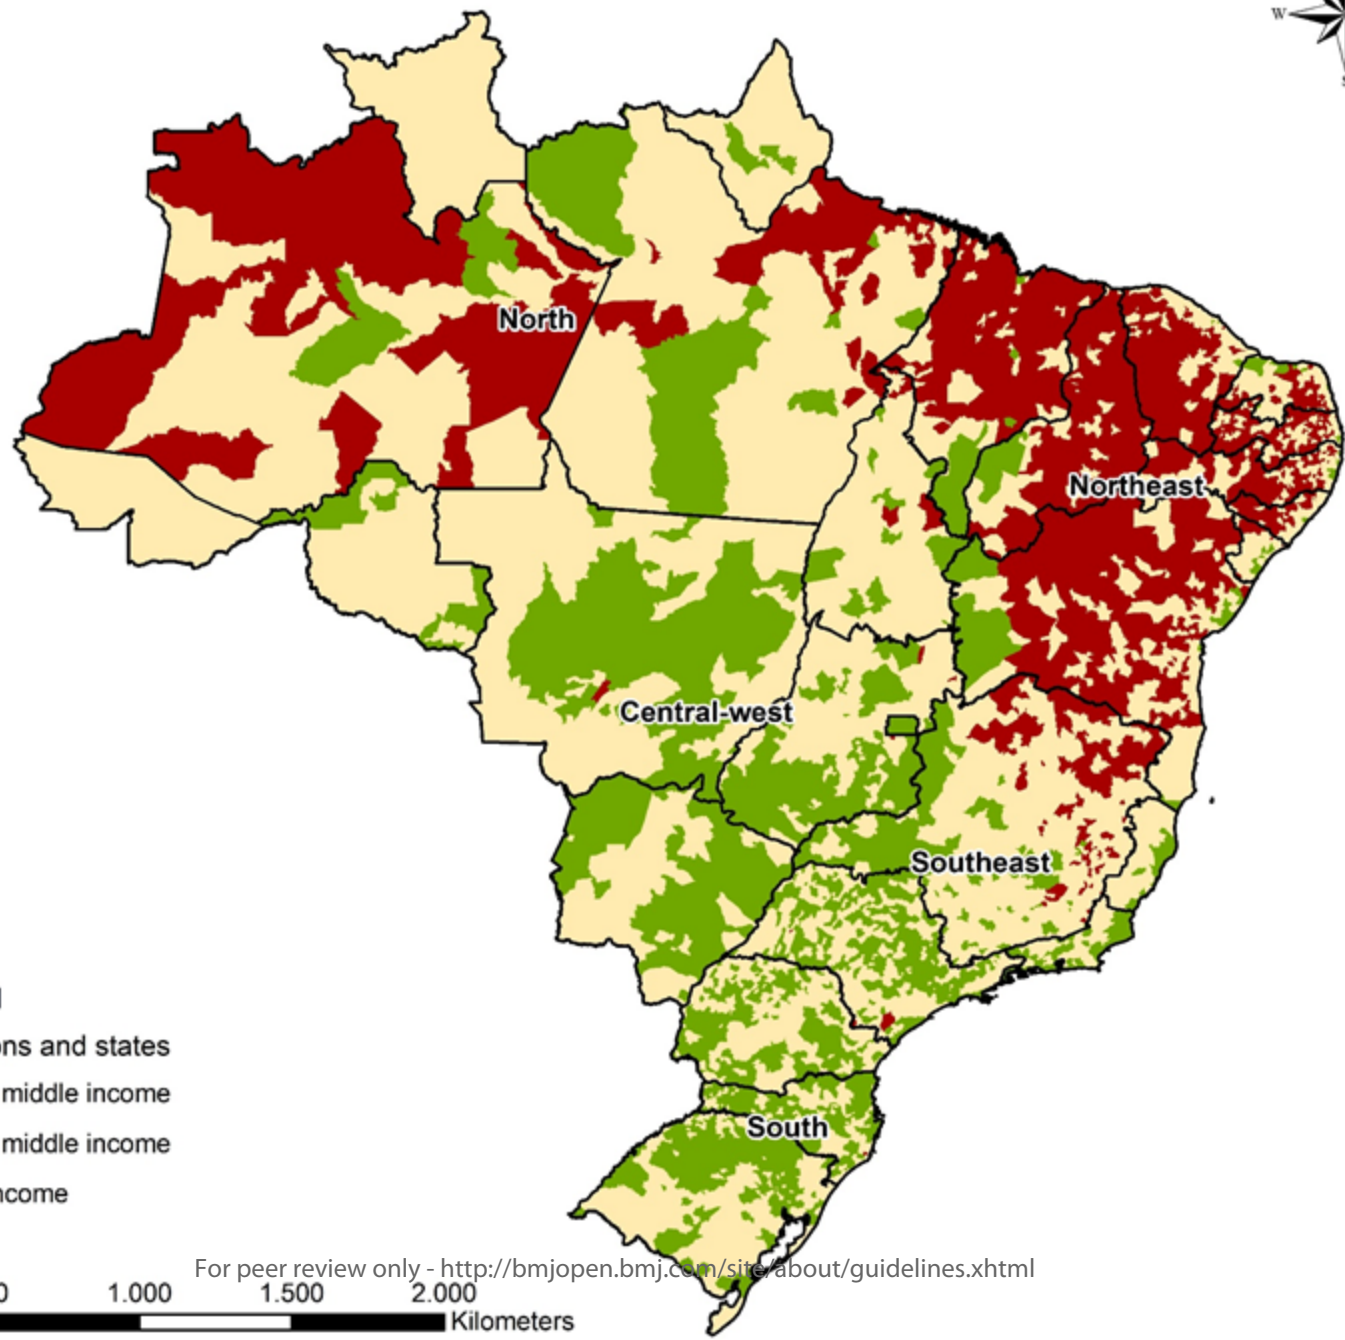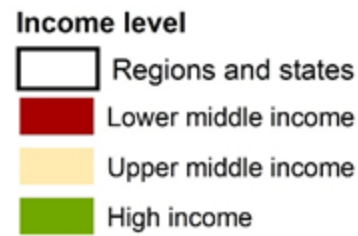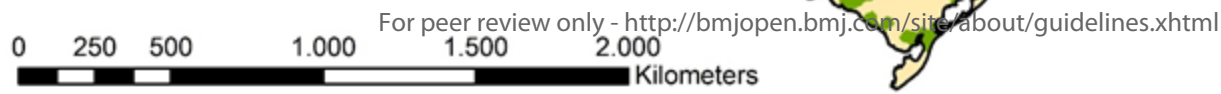

1  
2  
3  
4  
5  
6  
7  
8  
9  
10  
11  
12  
13  
14  
15  
16  
17  
18  
19  
20  
21  
22  
23  
24  
25  
26  
27  
28  
29  
30  
31  
32  
33  
34  
35  
36  
37  
38  
39  
40  
41

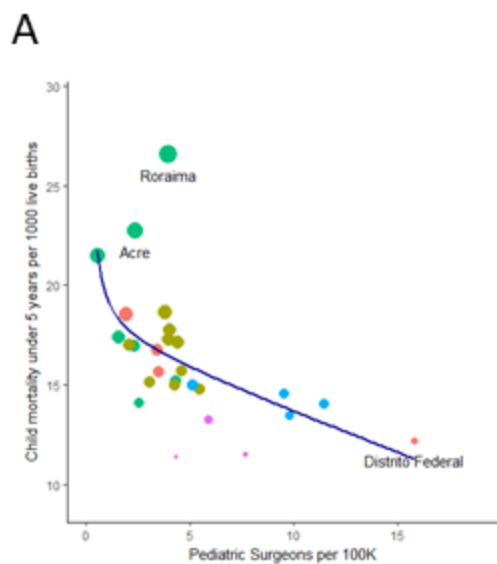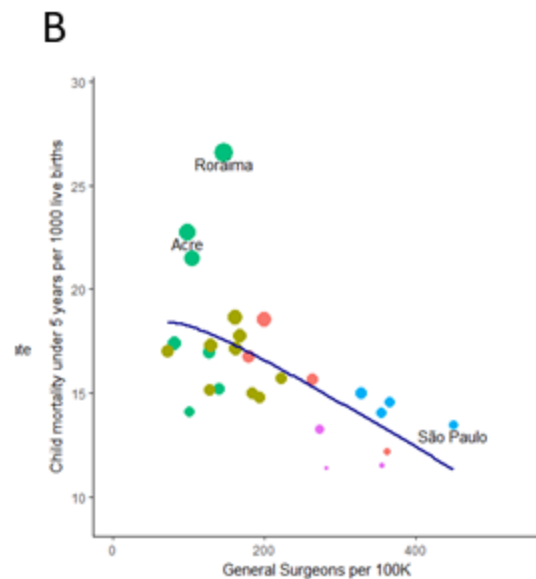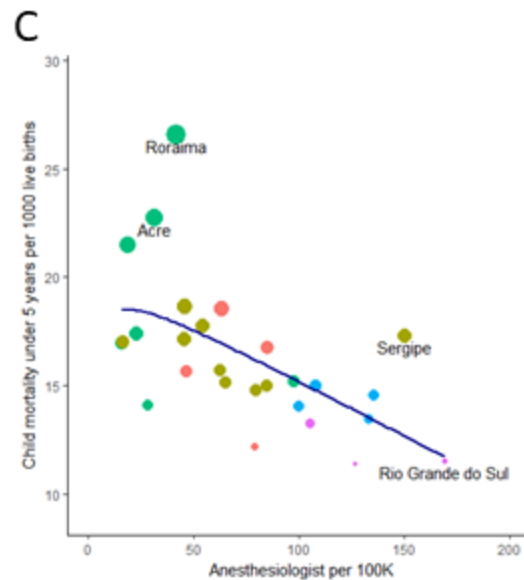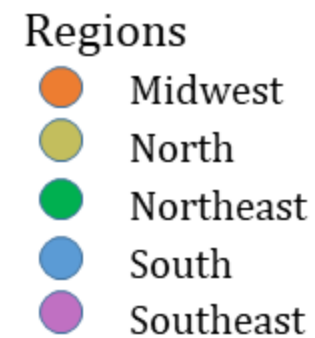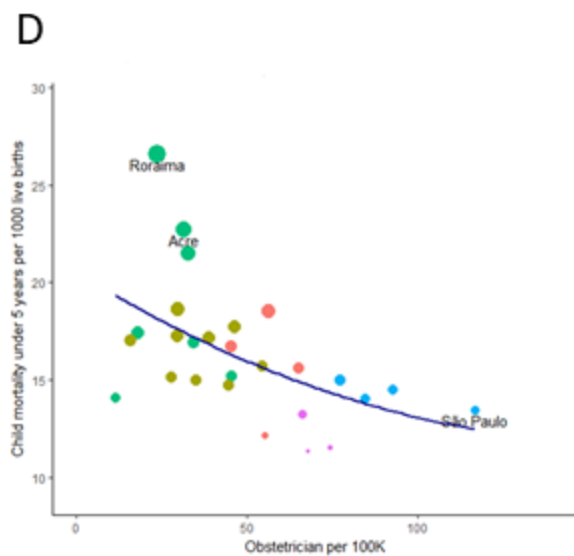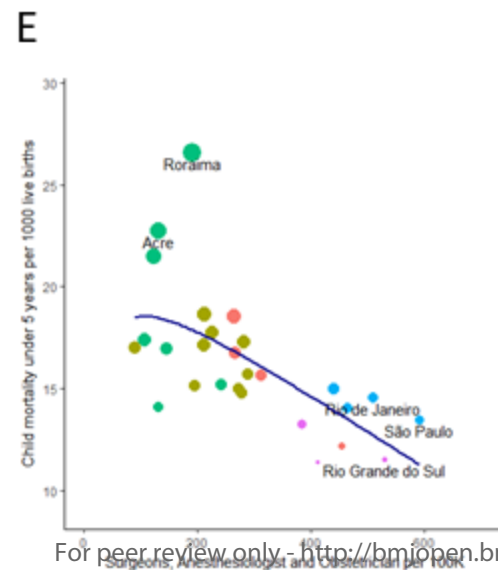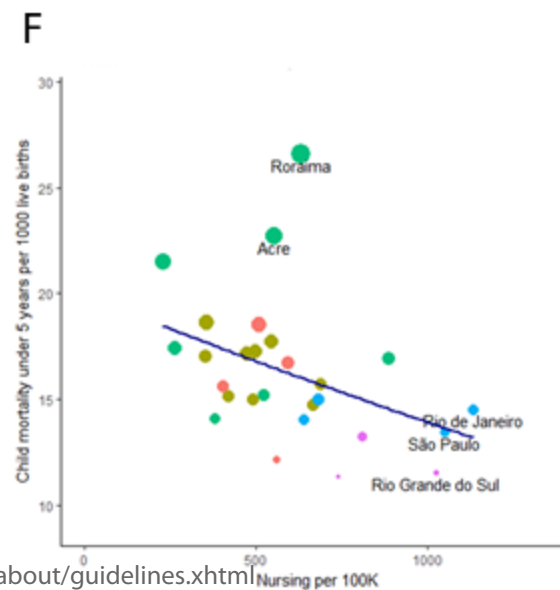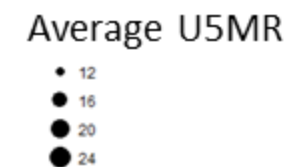

1  
2  
3  
4  
5  
6  
7  
8  
9  
10  
11  
12  
13  
14  
15  
16  
17  
18  
19  
20  
21  
22  
23  
24  
25  
26  
27  
28  
29  
30  
31  
32  
33  
34  
35  
36  
37  
38  
39  
40  
41



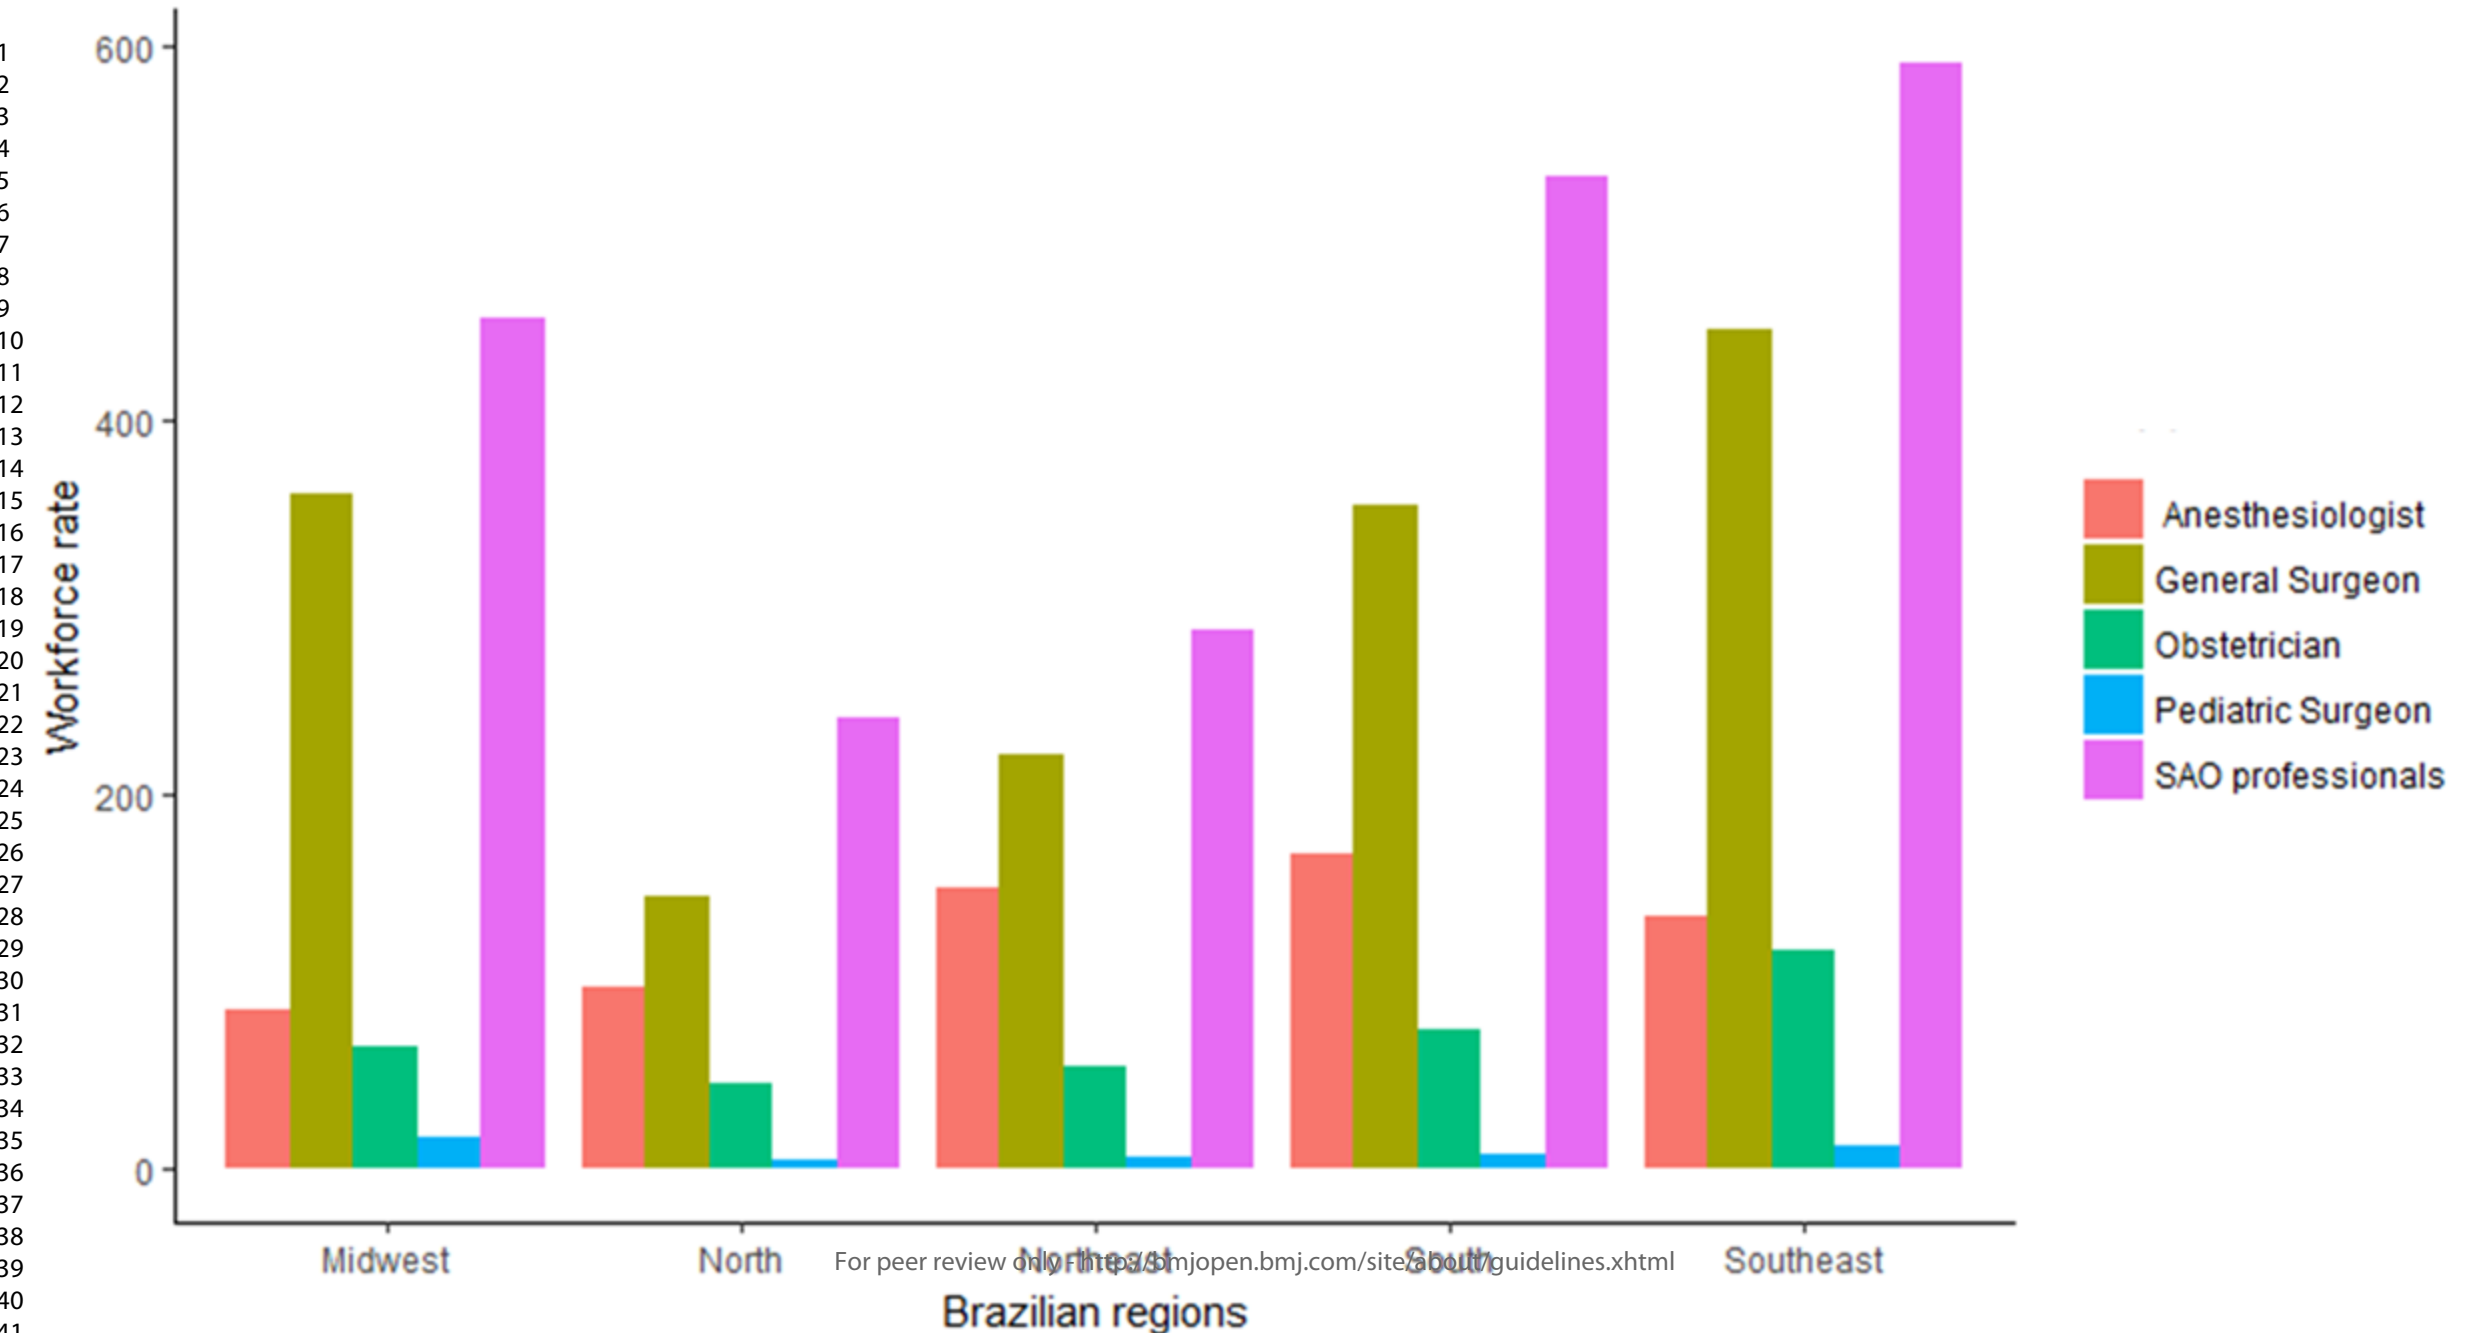

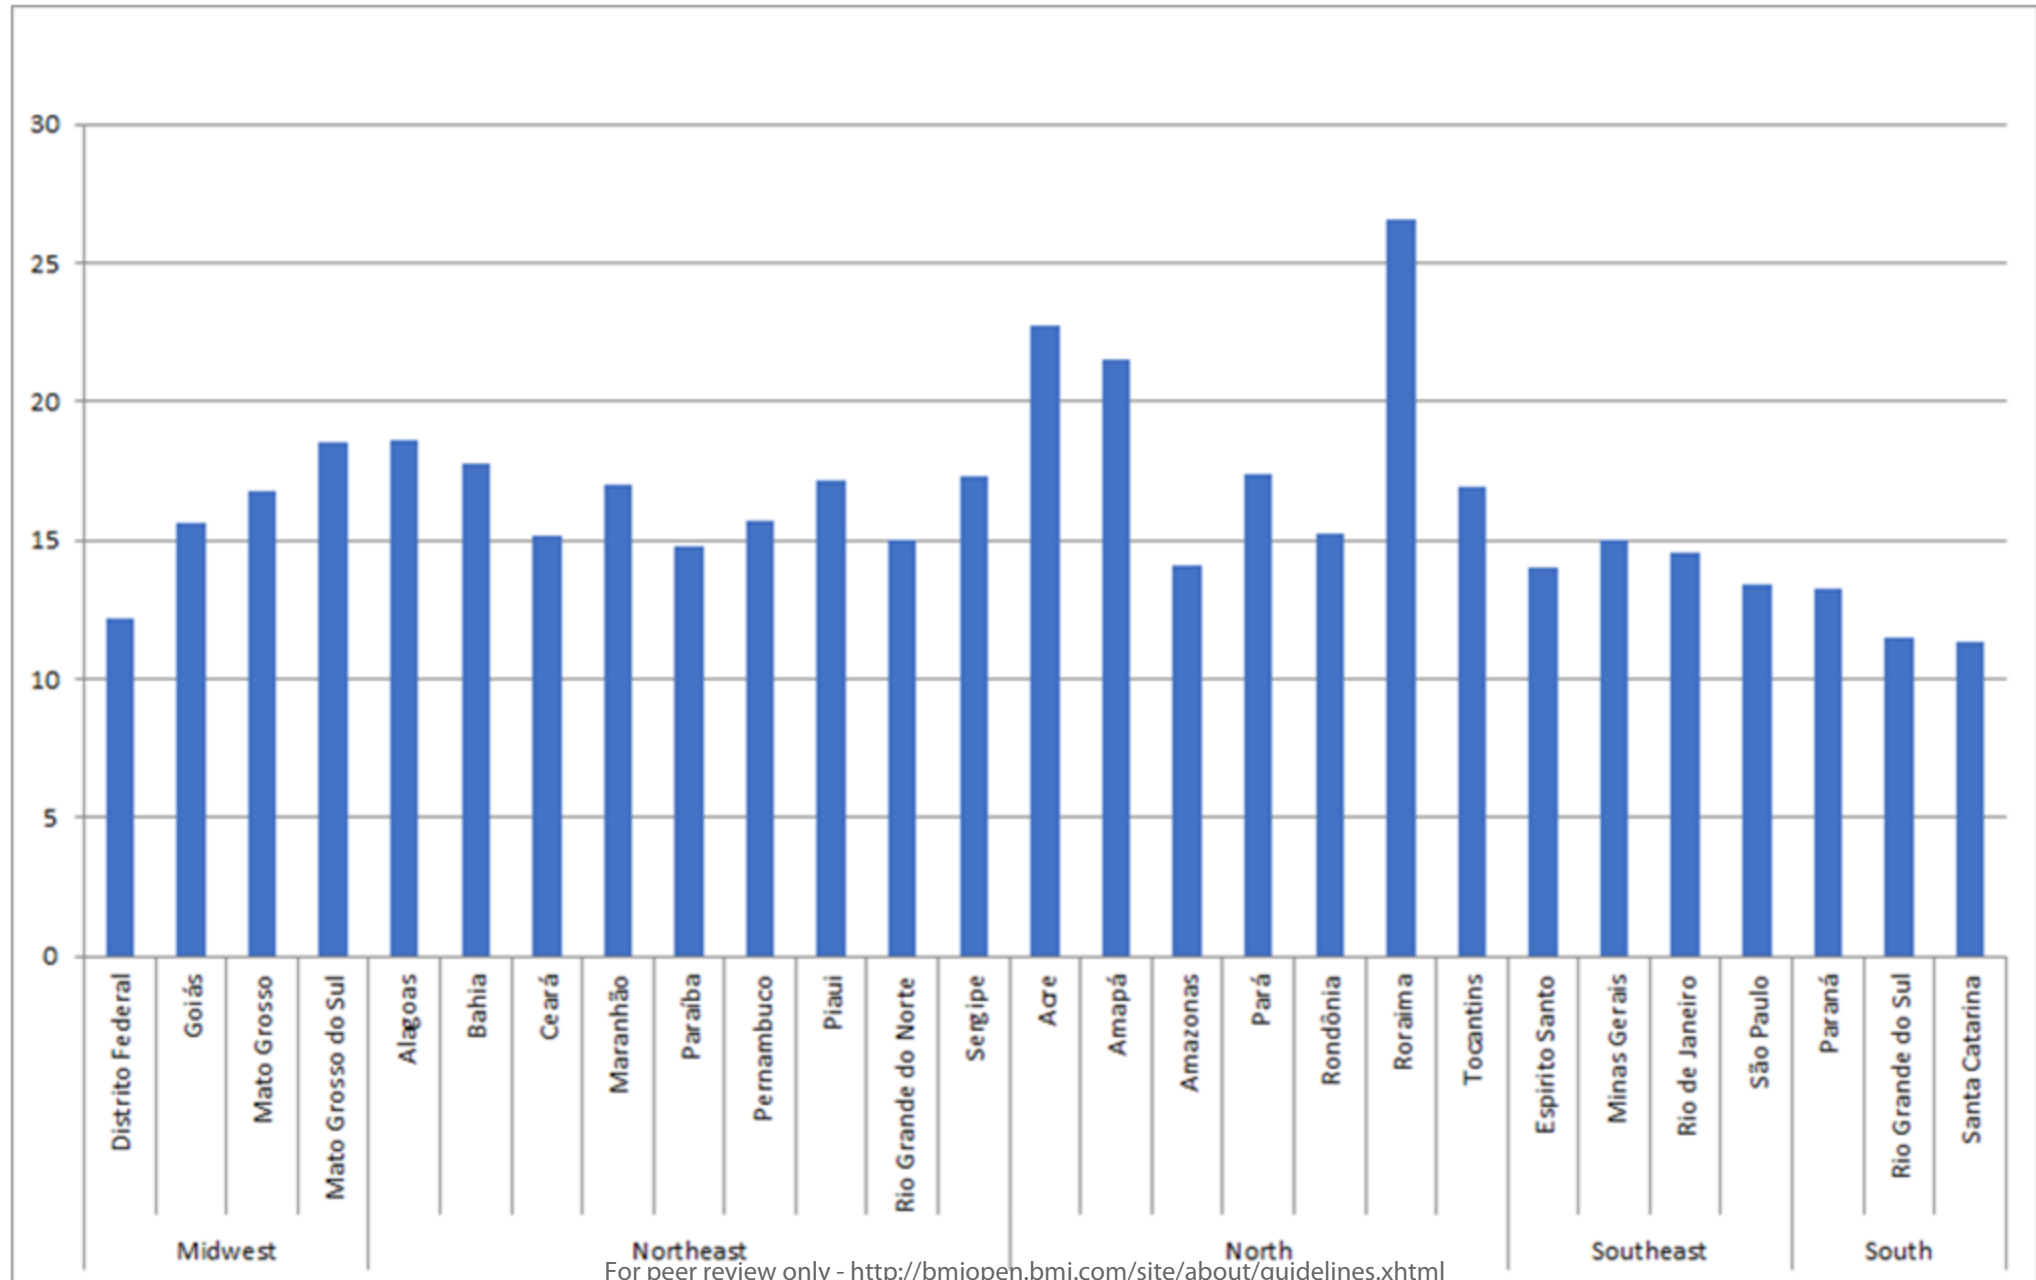

1  
2  
3  
4  
5  
6  
7  
8  
9  
10  
11  
12  
13  
14  
15  
16  
17  
18  
19  
20  
21  
22  
23  
24  
25  
26  
27  
28  
29  
30  
31  
32  
33  
34  
35  
36  
37  
38  
39  
40  
41



General Surgeon

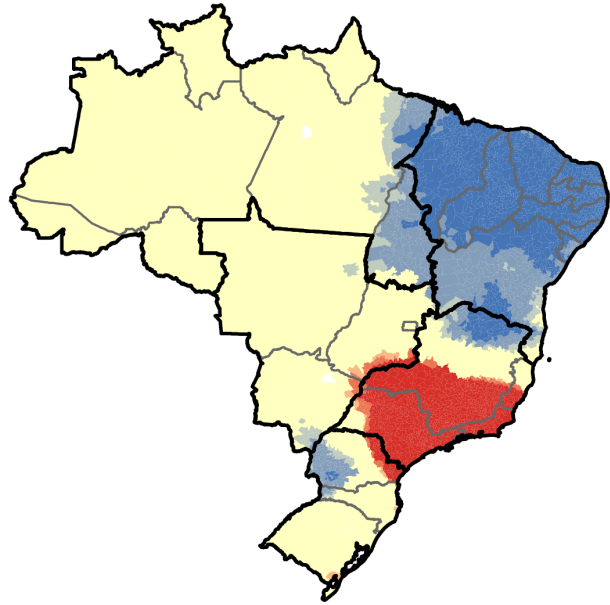

Pediatric Surgeon BMJ Open

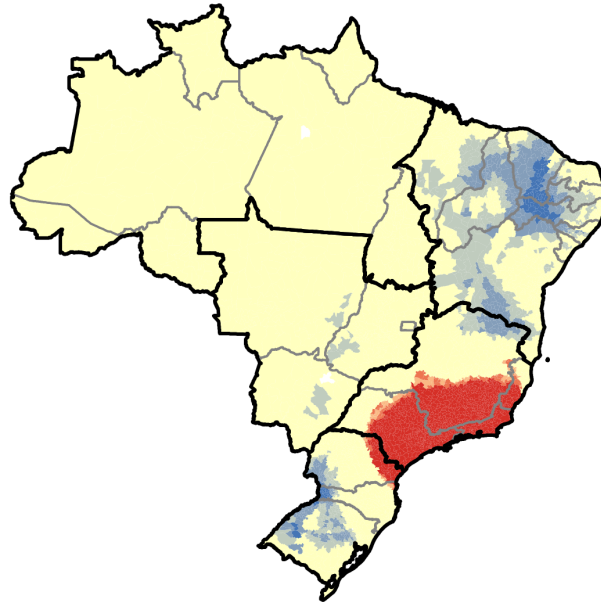

Obstetrician

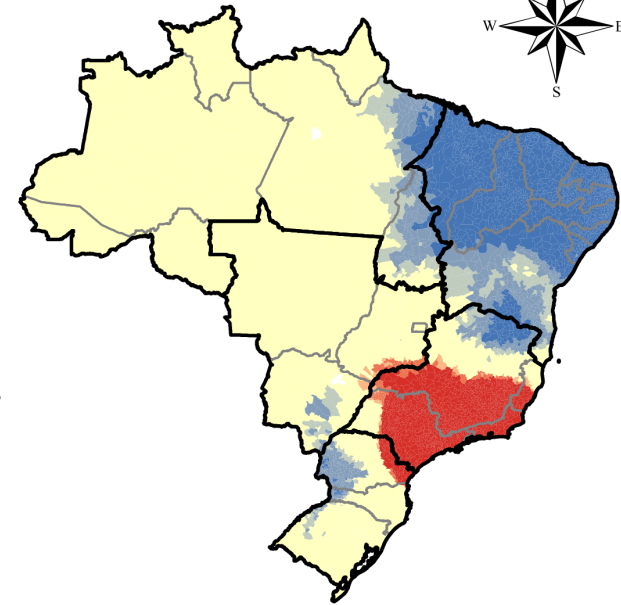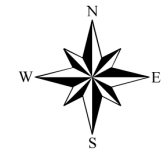

Anesthesiologist

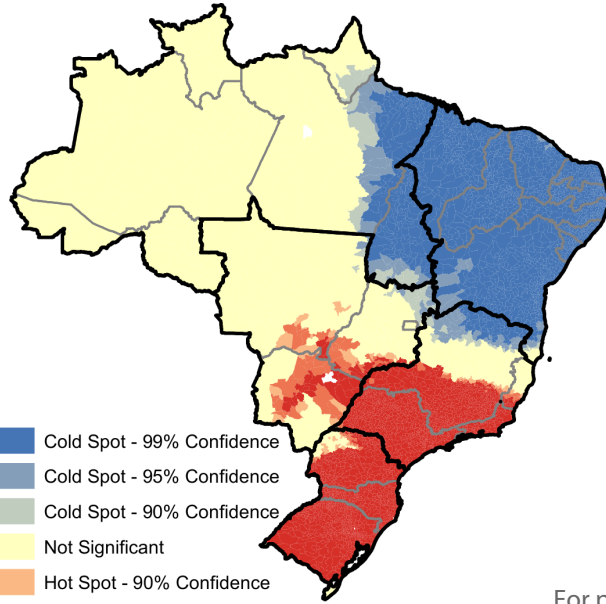

Surgeons, Anesthesiologist and obstetrician

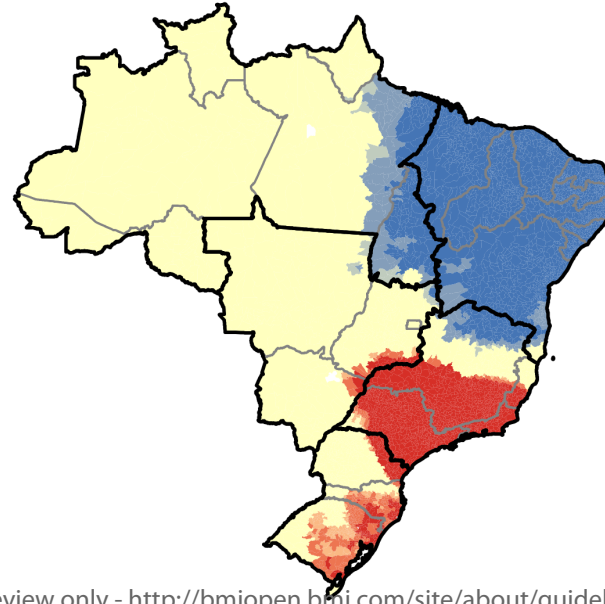

Under five mortality

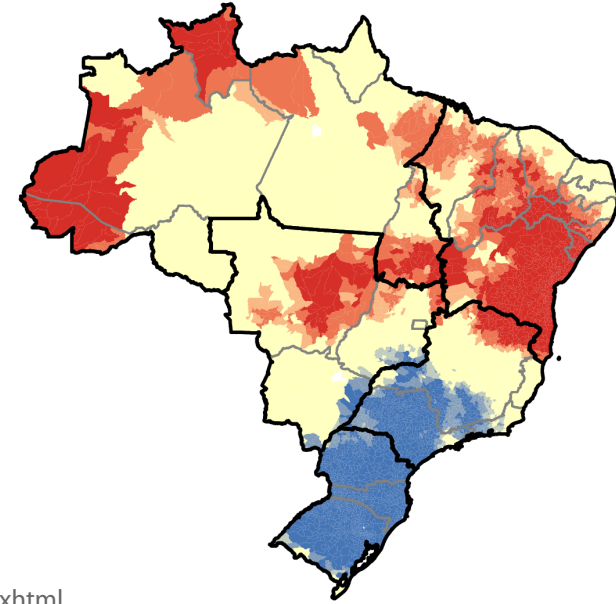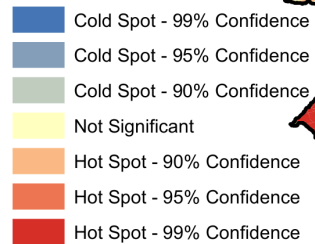

For peer review only - <http://bmjopen.bmj.com/site/about/guidelines.xhtml>

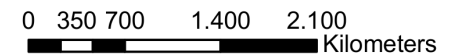

1  
2  
3  
4  
5  
6  
7  
8  
9  
10  
11  
12  
13  
14  
15  
16  
17  
18  
19  
20  
21  
22  
23  
24  
25  
26  
27  
28  
29  
30  
31  
32  
33  
34  
35  
36  
37  
38  
39  
40  
41

# Anesthesiologist

# Surgeons

1  
2  
3  
4  
5  
6  
7  
8  
9  
10  
11  
12  
13  
14  
15  
16  
17  
18  
19  
20  
21  
22  
23  
24  
25  
26  
27  
28  
29  
30  
31  
32  
33  
34  
35  
36  
37  
38  
39  
40  
41

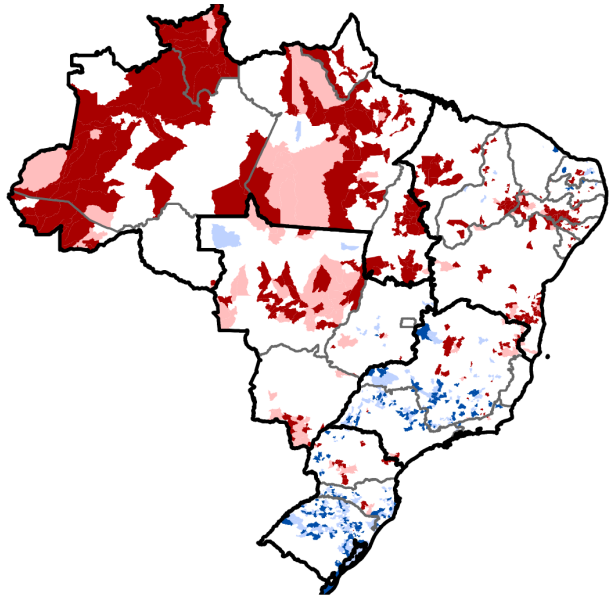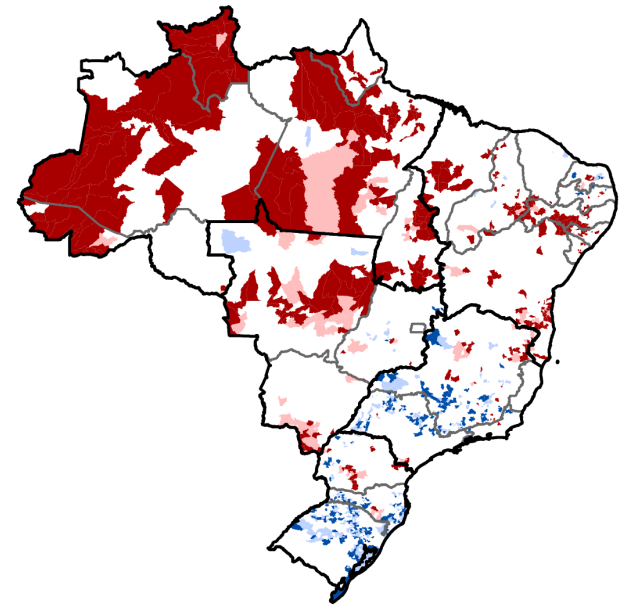

# Obstetrician

# SAP (Anesthesiologist, surgeons and obstetrician)

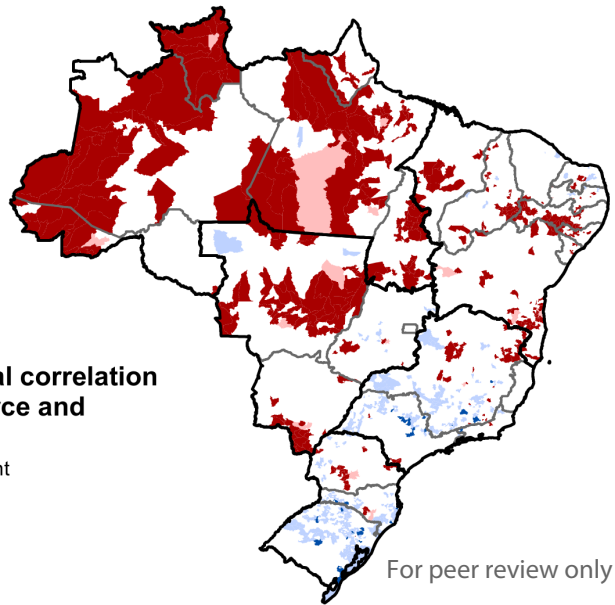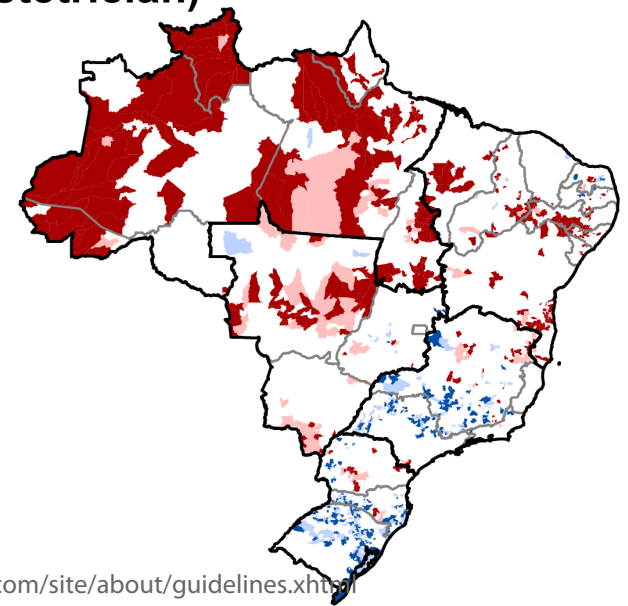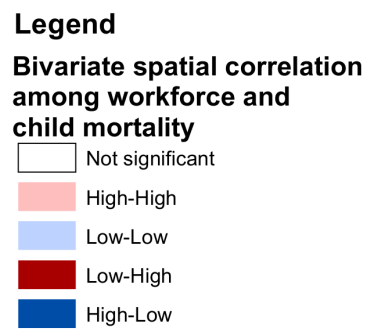



## Checklist of information that should be included in new reports of global health estimates

| Item #                                                                                                | Checklist item                                                                                                                                                                                                                                                                                                                                                                            | Reported on page # |
|-------------------------------------------------------------------------------------------------------|-------------------------------------------------------------------------------------------------------------------------------------------------------------------------------------------------------------------------------------------------------------------------------------------------------------------------------------------------------------------------------------------|--------------------|
| <b>Objectives and funding</b>                                                                         |                                                                                                                                                                                                                                                                                                                                                                                           |                    |
| 1                                                                                                     | Define the indicator(s), populations (including age, sex, and geographic entities), and time period(s) for which estimates were made.                                                                                                                                                                                                                                                     | 5                  |
| 2                                                                                                     | List the funding sources for the work.                                                                                                                                                                                                                                                                                                                                                    | 2                  |
| <b>Data Inputs</b>                                                                                    |                                                                                                                                                                                                                                                                                                                                                                                           |                    |
| <i>For all data inputs from multiple sources that are synthesized as part of the study:</i>           |                                                                                                                                                                                                                                                                                                                                                                                           |                    |
| 3                                                                                                     | Describe how the data were identified and how the data were accessed.                                                                                                                                                                                                                                                                                                                     | 5-6                |
| 4                                                                                                     | Specify the inclusion and exclusion criteria. Identify all ad-hoc exclusions.                                                                                                                                                                                                                                                                                                             | 5-6                |
| 5                                                                                                     | Provide information on all included data sources and their main characteristics. For each data source used, report reference information or contact name/institution, population represented, data collection method, year(s) of data collection, sex and age range, diagnostic criteria or measurement method, and sample size, as relevant.                                             | 5-7                |
| 6                                                                                                     | Identify and describe any categories of input data that have potentially important biases (e.g., based on characteristics listed in item 5).                                                                                                                                                                                                                                              | 10                 |
| <i>For data inputs that contribute to the analysis but were not synthesized as part of the study:</i> |                                                                                                                                                                                                                                                                                                                                                                                           |                    |
| 7                                                                                                     | Describe and give sources for any other data inputs.                                                                                                                                                                                                                                                                                                                                      | NA                 |
| <i>For all data inputs:</i>                                                                           |                                                                                                                                                                                                                                                                                                                                                                                           |                    |
| 8                                                                                                     | Provide all data inputs in a file format from which data can be efficiently extracted (e.g., a spreadsheet rather than a PDF), including all relevant meta-data listed in item 5. For any data inputs that cannot be shared because of ethical or legal reasons, such as third-party ownership, provide a contact name or the name of the institution that retains the right to the data. | 7                  |
| <b>Data analysis</b>                                                                                  |                                                                                                                                                                                                                                                                                                                                                                                           |                    |
| 9                                                                                                     | Provide a conceptual overview of the data analysis method. A diagram may be helpful.                                                                                                                                                                                                                                                                                                      | 5-7                |
| 10                                                                                                    | Provide a detailed description of all steps of the analysis, including mathematical formulae. This description should cover, as relevant, data cleaning, data pre-processing, data adjustments and weighting of data sources, and mathematical or statistical model(s).                                                                                                                   | 5-7                |
| 11                                                                                                    | Describe how candidate models were evaluated and how the final model(s) were selected.                                                                                                                                                                                                                                                                                                    | 5-7                |
| 12                                                                                                    | Provide the results of an evaluation of model performance, if done, as well as the results of any relevant sensitivity analysis.                                                                                                                                                                                                                                                          | 5-7                |
| 13                                                                                                    | Describe methods for calculating uncertainty of the estimates. State which sources of uncertainty were, and were not, accounted for in the uncertainty analysis.                                                                                                                                                                                                                          | 5-7                |
| 14                                                                                                    | State how analytic or statistical source code used to generate estimates can be accessed.                                                                                                                                                                                                                                                                                                 | 5-7                |
| <b>Results and Discussion</b>                                                                         |                                                                                                                                                                                                                                                                                                                                                                                           |                    |
| 15                                                                                                    | Provide published estimates in a file format from which data can be efficiently extracted.                                                                                                                                                                                                                                                                                                | 7                  |
| 16                                                                                                    | Report a quantitative measure of the uncertainty of the estimates (e.g. uncertainty intervals).                                                                                                                                                                                                                                                                                           | 7-9                |
| 17                                                                                                    | Interpret results in light of existing evidence. If updating a previous set of estimates, describe the reasons for changes in estimates.                                                                                                                                                                                                                                                  | 7-11               |
| 18                                                                                                    | Discuss limitations of the estimates. Include a discussion of any modelling assumptions or data limitations that affect interpretation of the estimates.                                                                                                                                                                                                                                  | 10                 |

This checklist should be used in conjunction with the GATHER statement and Explanation and Elaboration document, found on [gather-statement.org](http://gather-statement.org)
